# Supplementary material for: Proteome structuring of crown-of-thorns starfish
Source: Frontiers journal article supplement (doi:10.3389/fmars.2024.1487904), 2024-10-08
Supplement: Data_Sheet_1.ZIP [file Data_Sheet_1.ZIP]

## Sheet: AlphaFill result table
name	identity	pdb_id	analogue_id
XP_022109547.1	0.340708	3ppz	STU
XP_022109547.1	0.317164	4uya	ATP
XP_022109547.1	0.317164	4uya	MG
XP_022109547.1	0.319249	4csv	STI
XP_022109547.1	0.323944	3dqx	AMP
XP_022109547.1	0.323944	3en4	KS1
XP_022109547.1	0.323944	3qlg	1N1
XP_022109547.1	0.323944	4u5j	RXT
XP_022109547.1	0.323944	6l8l	1E8
XP_022109547.1	0.323944	7wf5	0LI
XP_022109547.1	0.323944	3geq	PP2
XP_022109547.1	0.319249	4mxo	DB8
XP_022109547.1	0.319249	4lgh	0JN
XP_022109547.1	0.314554	6f3f	ADP
XP_022109547.1	0.318725	7kja	MG
XP_022109547.1	0.318725	7kjc	ATP
XP_022086828.1	0.276596	6h7j	5FW
XP_022086828.1	0.276596	6h7j	NA
XP_022086828.1	0.276596	6h7j	2CV
XP_022086828.1	0.276596	6h7j	2CV
XP_022086828.1	0.276596	6h7j	2CV
XP_022086828.1	0.276596	6h7j	2CV
XP_022086828.1	0.276596	6h7j	2CV
XP_022086828.1	0.276596	6h7j	2CV
XP_022086828.1	0.276596	6h7j	2CV
XP_022086828.1	0.276596	6h7l	2CV
XP_022086828.1	0.276596	6h7l	2CV
XP_022086828.1	0.276596	6h7l	2CV
XP_022086828.1	0.276596	6h7l	2CV
XP_022086828.1	0.276596	6h7o	P32
XP_022086828.1	0.276596	6ibl	2CV
XP_022086828.1	0.282686	2y00	Y01
XP_022086828.1	0.282686	2y00	Y01
XP_022086828.1	0.282686	2y00	2CV
XP_022086828.1	0.282686	2y00	2CV
XP_022086828.1	0.282686	2y00	2CV
XP_022086828.1	0.282686	2y00	2CV
XP_022086828.1	0.282686	2y00	2CV
XP_022086828.1	0.282686	2y00	NA
XP_022086828.1	0.282686	2y00	Y01
XP_022086828.1	0.282686	2y00	2CV
XP_022086828.1	0.282686	2y00	2CV
XP_022086828.1	0.282686	2y00	2CV
XP_022086828.1	0.282686	2y00	2CV
XP_022086828.1	0.282686	2y00	2CV
XP_022086828.1	0.282686	2y00	2CV
XP_022086828.1	0.282686	2y00	2CV
XP_022086828.1	0.282686	2y01	2CV
XP_022086828.1	0.282686	3zpq	2CV
XP_022086828.1	0.282686	3zpq	2CV
XP_022086828.1	0.282686	3zpq	2CV
XP_022086828.1	0.282686	3zpq	2CV
XP_022086828.1	0.282686	3zpq	NA
XP_022086828.1	0.282686	3zpr	2CV
XP_022086828.1	0.282686	3zpr	2CV
XP_022086828.1	0.282686	4ami	2CV
XP_022086828.1	0.282686	4ami	2CV
XP_022086828.1	0.282686	4ami	2CV
XP_022086828.1	0.282686	4ami	2CV
XP_022086828.1	0.282686	4amj	2CV
XP_022086828.1	0.282686	4amj	2CV
XP_022086828.1	0.282686	4amj	2CV
XP_022086828.1	0.282686	4amj	2CV
XP_022086828.1	0.282686	4amj	2CV
XP_022086828.1	0.283688	4bvn	MHA
XP_022086828.1	0.276596	2vt4	D10
XP_022086828.1	0.276596	2vt4	D10
XP_022086828.1	0.276596	2vt4	NA
XP_022086828.1	0.276596	2ycw	CAU
XP_022086828.1	0.276596	2ycw	2CV
XP_022086828.1	0.320611	6tod	PGW
XP_022086828.1	0.320611	6tod	PGW
XP_022086828.1	0.296296	5cxv	0HK
XP_022086828.1	0.294118	4daj	0HK
XP_022086828.1	0.294118	4u15	TAR
XP_022086828.1	0.285714	4u15	TAR
XP_022086828.1	0.338028	3pwh	ZMA
XP_022086828.1	0.284483	3pwh	ZMA
XP_022086828.1	0.338028	5iu4	ZMA
XP_022086828.1	0.338028	5iu4	CLR
XP_022086828.1	0.338028	5iu4	OLB
XP_022086828.1	0.338028	5iu7	CLR
XP_022086828.1	0.338028	5iu7	OLB
XP_022086828.1	0.338028	5iu7	OLB
XP_022086828.1	0.338028	5iu7	OLB
XP_022086828.1	0.338028	5iu8	HTO
XP_022086828.1	0.338028	5iu8	OLB
XP_022086828.1	0.338028	5iua	OLB
XP_022086828.1	0.338028	5iub	OLB
XP_022086828.1	0.338028	5mzj	TEP
XP_022086828.1	0.338028	5mzp	CFF
XP_022086828.1	0.338028	5olv	CLR
XP_022086828.1	0.338028	8cu7	ETF
XP_022086828.1	0.252525	8cu7	CLR
XP_022086828.1	0.252525	8cu7	CLR
XP_022086828.1	0.252525	8cu7	ETF
XP_022086828.1	0.300699	5wiv	NA
XP_022086828.1	0.316456	6wgt	CLR
XP_022086828.1	0.316456	6wh4	CLR
XP_022086828.1	0.312977	6v9s	CLR
XP_022086828.1	0.291005	6wjc	Y01
XP_022086828.1	0.291005	6wjc	Y01
XP_022086828.1	0.338028	3eml	STE
XP_022086828.1	0.338028	3eml	STE
XP_022086828.1	0.338028	3eml	STE
XP_022086828.1	0.338028	3eml	STE
XP_022086828.1	0.338028	3eml	STE
XP_022086828.1	0.338028	3vg9	ZMA
XP_022086828.1	0.338028	3vg9	STE
XP_022086828.1	0.284483	3vg9	STE
XP_022086828.1	0.284483	3vg9	STE
XP_022086828.1	0.284483	3vg9	STE
XP_022086828.1	0.284483	3vg9	STE
XP_022086828.1	0.338028	5g53	NEC
XP_022086828.1	0.284483	5g53	NEC
XP_022086828.1	0.338028	5uig	EDT
XP_022086828.1	0.338028	6lpj	D12
XP_022086828.1	0.338028	6lpj	8K6
XP_022086828.1	0.338028	6lpj	D10
XP_022086828.1	0.338028	6lpj	MYS
XP_022086828.1	0.338028	6lpj	UND
XP_022086828.1	0.338028	6lpj	MYS
XP_022086828.1	0.338028	6lpj	8K6
XP_022086828.1	0.338028	6lpj	TRD
XP_022086828.1	0.338028	6lpj	MYS
XP_022086828.1	0.338028	6lpj	TRD
XP_022086828.1	0.338028	6lpj	TRD
XP_022086828.1	0.252525	6lpj	MYS
XP_022086828.1	0.252525	6lpj	OCT
XP_022086828.1	0.252525	6lpj	8K6
XP_022086828.1	0.252525	6lpj	OCT
XP_022086828.1	0.252525	6lpj	MYS
XP_022086828.1	0.252525	7rm5	CLR
XP_022086828.1	0.338028	8fyn	OLB
XP_022086828.1	0.338028	8fyn	NA
XP_022086828.1	0.338028	2ydo	ADN
XP_022086828.1	0.284483	2ydo	ADN
XP_022086828.1	0.338028	4ug2	OLB
XP_022086828.1	0.300752	7bts	1WV
XP_022086828.1	0.255319	7bu6	CLR
XP_022086828.1	0.300752	7bu7	1WV
XP_022086828.1	0.255319	7bu7	1WV
XP_022086828.1	0.300752	7bvq	CAU
XP_022086828.1	0.300752	7bvq	CAU
XP_022086828.1	0.303797	6a93	ZN
XP_022086828.1	0.303797	6a94	A6L
XP_022086828.1	0.303797	7vod	CLR
XP_022086828.1	0.303797	7wc8	CLR
XP_022086828.1	0.303797	7wc8	CLR
XP_022086828.1	0.303797	7wc8	CLR
XP_022086828.1	0.301471	4ib4	CLR
XP_022086828.1	0.301471	4ib4	OLB
XP_022086828.1	0.301471	4ib4	OLB
XP_022086828.1	0.260163	4lde	1WV
XP_022086828.1	0.260163	4ldl	1WV
XP_022086828.1	0.301471	6drx	CLR
XP_022094862.1	0.305677	6wq1	ZN
XP_022094862.1	0.305	8d0v	GSH
XP_022094862.1	0.305	3e73	GSH
XP_022094862.1	0.305	8czl	GSH
XP_022085735.1	0.614504	5o85	ZN
XP_022106753.1	0.257692	6n4x	MG
XP_022106753.1	0.325203	4or2	CLR
XP_022106753.1	0.325203	4or2	CLR
XP_022106753.1	0.325203	4or2	CLR
XP_022106753.1	0.325203	4or2	CLR
XP_022106753.1	0.257692	6n50	QUS
XP_022106753.1	0.312775	5c5c	CA
XP_022106753.1	0.312775	5c5c	CA
XP_022106753.1	0.253846	3lmk	MG
XP_022106753.1	0.274194	5k5s	CA
XP_022106753.1	0.274194	5k5s	CA
XP_022106753.1	0.259516	5k5s	CA
XP_022106753.1	0.286364	5fbh	GD3
XP_022106753.1	0.286364	5fbh	MG
XP_022106753.1	0.261682	5x2m	NA
XP_022106753.1	0.328671	5x2o	NA
XP_022089668.1	0.277778	2wef	MG
XP_022089668.1	0.277778	2wef	MG
XP_022089668.1	0.277778	2wef	AMP
XP_022089668.1	0.278571	4qxd	MG
XP_022089668.1	0.278571	4qxd	MG
XP_022089668.1	0.28	7kio	CA
XP_022089668.1	0.308511	1k9z	ZN
XP_022089668.1	0.308511	1k9z	ZN
XP_022089668.1	0.267857	4fr2	NI
XP_022086303.1	0.441472	7ong	CA
XP_022086303.1	0.441472	7ong	CA
XP_022086303.1	0.441472	7ong	CA
XP_022086303.1	0.441472	7ong	CA
XP_022086303.1	0.441472	7ong	CA
XP_022086303.1	0.441472	7ong	CA
XP_022086303.1	0.441472	7ong	CA
XP_022086303.1	0.441472	7ong	CA
XP_022086303.1	0.441472	7ong	CA
XP_022086303.1	0.441472	7ong	CA
XP_022086303.1	0.445902	7ona	CA
XP_022086303.1	0.445902	7ona	CA
XP_022086303.1	0.445902	7ona	CA
XP_022086303.1	0.445902	7ona	CA
XP_022086303.1	0.425743	6gy5	NA
XP_022086303.1	0.425743	6gy5	NA
XP_022086303.1	0.425743	6gy5	NA
XP_022086303.1	0.425743	6gy5	NA
XP_022086303.1	0.425743	6gy5	NA
XP_022086303.1	0.425743	6gy5	NA
XP_022086303.1	0.425743	6gy5	NA
XP_022086303.1	0.425743	6gy5	NA
XP_022086303.1	0.425743	6gy5	NA
XP_022086303.1	0.425743	6gy5	NA
XP_022086303.1	0.425743	6gy5	NA
XP_022086303.1	0.425743	6gy5	NA
XP_022086303.1	0.425743	6gy5	NA
XP_022086303.1	0.407801	6hrl	NA
XP_022086303.1	0.407801	6hrl	NA
XP_022086303.1	0.407801	6hrl	NA
XP_022086303.1	0.407801	6hrl	NA
XP_022086303.1	0.391003	5fzn	FB2
XP_022086303.1	0.391003	7c5e	FUM
XP_022086303.1	0.391003	7c5e	FUM
XP_022086303.1	0.391003	7c5e	FUM
XP_022086303.1	0.385159	4l7b	NA
XP_022086303.1	0.385159	6fmp	NA
XP_022086303.1	0.385159	6fmq	NA
XP_022086303.1	0.385159	6fmq	NA
XP_022086303.1	0.385159	6fmq	NA
XP_022086303.1	0.385159	6fmq	NA
XP_022086303.1	0.385159	6fmq	NA
XP_022086303.1	0.385159	6hws	NA
XP_022086303.1	0.385159	6hws	NA
XP_022086303.1	0.385159	6hws	NA
XP_022086303.1	0.385159	6hws	NA
XP_022086303.1	0.385159	6rog	NA
XP_022086303.1	0.385159	6rog	NA
XP_022086303.1	0.385159	6tg8	NA
XP_022086303.1	0.381625	6v6z	NA
XP_022086303.1	0.381625	6v6z	NA
XP_022086303.1	0.381625	6v6z	NA
XP_022086303.1	0.381625	6v6z	DTD
XP_022086303.1	0.325503	6ttk	NA
XP_022086303.1	0.325503	6ttk	NA
XP_022086303.1	0.325503	6ttk	NA
XP_022086303.1	0.332226	2xn4	NA
XP_022101212.1	0.442438	7sz8	CA
XP_022101212.1	0.442438	7sz8	CA
XP_022101212.1	0.442438	7sz8	CA
XP_022101212.1	0.442438	7sz8	CA
XP_022101212.1	0.442438	7sz8	NA
XP_022101212.1	0.442438	7sz8	CA
XP_022101212.1	0.442438	7sz8	CA
XP_022101212.1	0.442438	7sz8	CA
XP_022101212.1	0.442438	7sz8	CA
XP_022101212.1	0.442438	7sz8	MG
XP_022101212.1	0.372093	7sz8	NA
XP_022101212.1	0.372093	7sz8	CA
XP_022101212.1	0.372093	7sz8	CA
XP_022101212.1	0.372093	7sz8	CA
XP_022101212.1	0.372093	7sz8	CA
XP_022101212.1	0.322957	6e6b	CA
XP_022101212.1	0.322957	6e6b	CA
XP_022101212.1	0.322957	6e6b	CA
XP_022101212.1	0.322957	6e6b	CA
XP_022101212.1	0.322957	6e6b	CA
XP_022101212.1	0.322957	6e6b	CA
XP_022101212.1	0.322957	6e6b	CA
XP_022101212.1	0.307692	6e6b	CA
XP_022101212.1	0.307692	6e6b	CA
XP_022101212.1	0.307692	6e6b	CA
XP_022101212.1	0.307692	6e6b	CA
XP_022101212.1	0.307692	6e6b	CA
XP_022101212.1	0.307692	6e6b	CA
XP_022101212.1	0.307692	6e6b	CA
XP_022101212.1	0.326531	6e6b	CA
XP_022101212.1	0.307692	6e6b	CA
XP_022101212.1	0.299048	5szn	CA
XP_022101212.1	0.286458	5szn	CA
XP_022101212.1	0.286458	5szn	CA
XP_022101212.1	0.286458	5szn	CA
XP_022101212.1	0.286458	5szn	CA
XP_022101212.1	0.280811	6vg1	CA
XP_022101212.1	0.280811	6vg1	NA
XP_022101212.1	0.28777	5t9t	CA
XP_022101212.1	0.28777	5t9t	CA
XP_022101212.1	0.28777	5t9t	CA
XP_022101212.1	0.28777	5t9t	CA
XP_022101212.1	0.269345	6vg4	CA
XP_022101212.1	0.269345	6vg4	TAM
XP_022101212.1	0.269345	6vg4	NA
XP_022101212.1	0.31	6vg4	CA
XP_022101212.1	0.31	6vg4	NA
XP_022101212.1	0.308219	6pgw	NA
XP_022101212.1	0.28836	6pgw	NA
XP_022101212.1	0.292453	6pgw	NA
XP_022101212.1	0.314554	5szp	TMO
XP_022101212.1	0.288288	5szp	CA
XP_022101212.1	0.288288	5szp	TMO
XP_022101212.1	0.314554	5szp	TMO
XP_022101212.1	0.288288	5szp	TMO
XP_022101212.1	0.288288	5szp	CA
XP_022101212.1	0.341538	5uz8	GSH
XP_022101212.1	0.32526	5uz8	GSH
XP_022101212.1	0.286385	7stz	CA
XP_022101212.1	0.292453	5szr	CA
XP_022101212.1	0.289044	5iu9	NA
XP_022101212.1	0.274939	5iu9	NA
XP_022101212.1	0.343109	5un2	K
XP_022101212.1	0.343109	5un2	K
XP_022101212.1	0.270627	5un2	K
XP_022101212.1	0.270627	5un2	K
XP_022101212.1	0.288288	3q2v	MN
XP_022101212.1	0.288288	3q2v	MN
XP_022101212.1	0.337017	5w1d	K
XP_022101212.1	0.3207	5w1d	K
XP_022101212.1	0.372372	5tfm	NA
XP_022101212.1	0.338926	5tfm	NA
XP_022101212.1	0.269488	6vft	CA
XP_022101212.1	0.286567	6vft	CA
XP_022101212.1	0.309038	6bx7	CA
XP_022101212.1	0.269231	6bx7	CA
XP_022101212.1	0.284457	6vfu	CA
XP_022101212.1	0.293286	1l3w	CA
XP_022101212.1	0.28266	5k8r	NA
XP_022101212.1	0.339394	6vfr	NA
XP_022101212.1	0.306785	6vfp	CA
XP_022101212.1	0.313305	5w4t	CA
XP_022101212.1	0.278846	5erp	CA
XP_022101212.1	0.27551	4xhz	CA
XP_022101212.1	0.274336	2a62	CA
XP_022101212.1	0.271845	5iry	CA
XP_022101212.1	0.271845	5iry	CA
XP_022101212.1	0.271845	5iry	CA
XP_022101212.1	0.3	5vt8	CA
XP_022101212.1	0.3	5vt8	CA
XP_022101212.1	0.267347	5j5j	CA
XP_022101212.1	0.267347	5j5j	CA
XP_022101212.1	0.264198	5j5j	CA
XP_022101212.1	0.333333	7t3s	NA
XP_022101212.1	0.291262	4zi8	CA
XP_022101212.1	0.283133	5erd	CA
XP_022101212.1	0.283133	5erd	CA
XP_022101212.1	0.284345	4zpn	CA
XP_022101212.1	0.305147	4zpp	CA
XP_022101212.1	0.347032	5wj8	CA
XP_022101212.1	0.347032	5wj8	K
XP_022101212.1	0.305936	5wj8	CA
XP_022101212.1	0.305936	5wj8	K
XP_022101212.1	0.358333	7suu	K
XP_022101212.1	0.35514	7suu	K
XP_022101212.1	0.325359	7suu	K
XP_022101212.1	0.358333	7suu	CA
XP_022101212.1	0.358333	7suu	K
XP_022101212.1	0.358333	7suu	K
XP_022101212.1	0.358333	7suu	K
XP_022101212.1	0.35514	7suu	CA
XP_022101212.1	0.35514	7suu	K
XP_022101212.1	0.35514	7suu	K
XP_022101212.1	0.35514	7suu	K
XP_022101212.1	0.325359	7suu	CA
XP_022101212.1	0.325359	7suu	K
XP_022101212.1	0.325359	7suu	K
XP_022101212.1	0.325359	7suu	K
XP_022101212.1	0.347032	5wjm	K
XP_022101212.1	0.352041	5wjm	K
XP_022101212.1	0.310345	5wjm	CA
XP_022101212.1	0.310345	5wjm	CA
XP_022101212.1	0.310345	5wjm	K
XP_022101212.1	0.346847	5tfl	NA
XP_022101212.1	0.318584	5tfl	NA
XP_022101212.1	0.345	2wcp	NA
XP_022101212.1	0.345	2wcp	NA
XP_022101212.1	0.345	2wcp	NA
XP_022101212.1	0.322115	2wcp	NA
XP_022101212.1	0.322115	2wcp	NA
XP_022101212.1	0.3125	2wcp	NA
XP_022101212.1	0.3125	2wcp	NA
XP_022101212.1	0.3125	2wcp	NA
XP_022101212.1	0.345	2whv	K
XP_022101212.1	0.345	2whv	K
XP_022101212.1	0.322115	2whv	K
XP_022101212.1	0.322115	2whv	K
XP_022101212.1	0.322115	2whv	K
XP_022101212.1	0.322115	2whv	K
XP_022101212.1	0.3125	2whv	K
XP_022101212.1	0.3125	2whv	K
XP_022101212.1	0.3125	2whv	K
XP_022101212.1	0.3125	2whv	K
XP_022101212.1	0.303167	5co1	CA
XP_022101212.1	0.304569	5co1	CA
XP_022101212.1	0.297436	5co1	CA
XP_022101212.1	0.322115	7scm	NA
XP_022101212.1	0.278846	7scm	K
XP_022101212.1	0.278846	7scm	NA
XP_022101212.1	0.335	7scm	NA
XP_022101212.1	0.322115	7scm	NA
XP_022101212.1	0.278846	7scm	NA
XP_022101212.1	0.338095	6bwn	K
XP_022101212.1	0.330189	6bwn	K
XP_022101212.1	0.339623	6bwn	K
XP_022101212.1	0.325243	7sgx	CA
XP_022101212.1	0.32093	7sgx	CA
XP_022101212.1	0.299492	7sgx	CA
XP_022101212.1	0.325243	7sgx	CA
XP_022101212.1	0.32093	7sgx	CA
XP_022101212.1	0.299492	7sgx	CA
XP_022101212.1	0.325243	7sgx	CA
XP_022101212.1	0.299492	7sgx	CA
XP_022101212.1	0.307692	6vfv	CA
XP_022101212.1	0.307692	6vfv	CA
XP_022101212.1	0.325243	7n4p	NA
XP_022101212.1	0.306977	7n4p	NA
XP_022101212.1	0.306977	7n4p	NA
XP_022101212.1	0.302564	7n4p	NA
XP_022101212.1	0.302564	7n4p	NA
XP_022101212.1	0.327189	5vh2	NA
XP_022101212.1	0.311628	5vh2	NA
XP_022101212.1	0.298578	5vh2	NA
XP_022101212.1	0.297297	6e8f	CA
XP_022101212.1	0.325123	8e51	K
XP_022101212.1	0.325123	8e51	K
XP_022101212.1	0.308057	8e51	K
XP_022101212.1	0.308057	8e51	K
XP_022101212.1	0.303738	8e51	K
XP_022101212.1	0.303738	8e51	K
XP_022101212.1	0.319372	4zmn	CA
XP_022101212.1	0.288557	4zmn	CA
XP_022101212.1	0.340659	3lnd	CA
XP_022101212.1	0.342246	6cgu	CA
XP_022101212.1	0.331288	6cgu	CA
XP_022101212.1	0.307229	6cgu	CA
XP_022101212.1	0.340659	6cgu	CA
XP_022101212.1	0.292453	6ztb	NA
XP_022101212.1	0.292453	6ztb	NA
XP_022101212.1	0.292453	6ztb	NA
XP_022101212.1	0.322034	6ztb	NA
XP_022101212.1	0.322034	6ztb	NA
XP_022101212.1	0.297872	6ztb	NA
XP_022101212.1	0.297872	6ztb	NA
XP_022101212.1	0.297872	6ztb	NA
XP_022101212.1	0.269036	7n86	CA
XP_022085277.1	0.280702	4toi	ZN
XP_022085277.1	0.28169	2uu9	MG
XP_022085277.1	0.28169	2vqf	MG
XP_022085277.1	0.28169	4b3r	MG
XP_022085277.1	0.28169	4b3s	MG
XP_022085277.1	0.28169	4dr1	MG
XP_022085277.1	0.28169	4dr3	MG
XP_022085277.1	0.28169	4duy	MG
XP_022085277.1	0.28169	4dv3	MG
XP_022085277.1	0.28169	4ji1	MG
XP_022085277.1	0.28169	4kvb	MG
XP_022085277.1	0.28169	5br8	MG
XP_022102892.1	0.333333	5evj	NA
XP_022102892.1	0.31875	4fr0	SAM
XP_022102892.1	0.31875	4fs8	CA
XP_022102892.1	0.31875	4fsd	ARS
XP_022102892.1	0.31875	4fsd	CA
XP_022102892.1	0.31875	4rsr	MG
XP_022102892.1	0.31875	4rsr	NA
XP_022102892.1	0.31875	6cx6	SAH
XP_022102892.1	0.288462	1dl5	SAH
XP_022106533.1	0.257812	5kkq	ZN
XP_022106533.1	0.257812	5kkq	ZN
XP_022106533.1	0.257812	5kkq	ZN
XP_022106533.1	0.257812	5kkq	ZN
XP_022106533.1	0.257812	5kkq	ZN
XP_022110968.1	0.275168	6r5y	ZN
XP_022110968.1	0.251613	6r5y	ZN
XP_022110968.1	0.255319	6r5y	ZN
XP_022110968.1	0.251656	6r5y	ZN
XP_022110968.1	0.275168	6r5y	ZN
XP_022110968.1	0.251613	6r5y	ZN
XP_022110968.1	0.255319	6r5y	ZN
XP_022110968.1	0.25	6r5y	ZN
XP_022110968.1	0.251656	6r5y	ZN
XP_022110968.1	0.251613	6r5y	ZN
XP_022110968.1	0.255319	6r5y	ZN
XP_022110968.1	0.251656	6r5y	ZN
XP_022110968.1	0.251613	6r5y	ZN
XP_022110968.1	0.262887	6y7o	SIW
XP_022110968.1	0.262887	6y7o	SIW
XP_022110968.1	0.262887	6y7o	SIW
XP_022110968.1	0.262887	6y7o	SIW
XP_022110968.1	0.262887	6y7o	SIW
XP_022110968.1	0.262887	6y7o	SIW
XP_022110968.1	0.262887	6y7o	SIW
XP_022110968.1	0.262887	6y7o	SIW
XP_022110968.1	0.262887	6y7o	SIW
XP_022110968.1	0.25	6d9x	NA
XP_022110968.1	0.271318	6iam	K
XP_022110968.1	0.271318	6iam	K
XP_022110968.1	0.271318	6iam	K
XP_022110968.1	0.25	6iam	K
XP_022110968.1	0.25	6iam	K
XP_022110968.1	0.252427	6iam	K
XP_022110968.1	0.252427	6iam	K
XP_022110968.1	0.271318	7axs	ALQ
XP_022110968.1	0.25	7axs	ALQ
XP_022110968.1	0.252427	7axs	ALQ
XP_022094842.1	0.440129	5v3m	ZN
XP_022094842.1	0.440129	5v3m	ZN
XP_022094842.1	0.440129	5v3m	ZN
XP_022094842.1	0.440129	5v3m	ZN
XP_022094842.1	0.440129	5v3m	ZN
XP_022094842.1	0.440129	5v3m	ZN
XP_022094842.1	0.440129	5v3m	ZN
XP_022094842.1	0.440129	5v3m	ZN
XP_022094842.1	0.440129	5v3m	ZN
XP_022094842.1	0.440129	5v3m	ZN
XP_022094842.1	0.423529	5v3m	ZN
XP_022094842.1	0.423529	5v3m	ZN
XP_022094842.1	0.423529	5v3m	ZN
XP_022094842.1	0.446809	5wjq	ZN
XP_022094842.1	0.437722	5v3j	MG
XP_022094842.1	0.516484	2i13	ZN
XP_022094842.1	0.442308	7eyi	BO3
XP_022094842.1	0.5	4r2c	K
XP_022094842.1	0.488636	4r2c	K
XP_022094842.1	0.339286	1tf6	ZN
XP_022094842.1	0.345679	1tf6	ZN
XP_022094842.1	0.476744	5kl2	NA
XP_022094842.1	0.465116	5kl2	NA
XP_022094842.1	0.44186	5kl2	NA
XP_022094842.1	0.418605	5kl2	NA
XP_022094842.1	0.476744	5kl4	CA
XP_022094842.1	0.465116	5kl4	CA
XP_022094842.1	0.44186	5kl4	CA
XP_022094842.1	0.418605	5kl4	CA
XP_022094842.1	0.476744	5kl4	NA
XP_022094842.1	0.465116	5kl4	NA
XP_022094842.1	0.44186	5kl4	NA
XP_022094842.1	0.418605	5kl4	NA
XP_022094842.1	0.389474	6u9q	MG
XP_022094842.1	0.378947	6u9q	MG
XP_022094842.1	0.347368	6u9q	MG
XP_022094842.1	0.321429	6a57	ZN
XP_022094842.1	0.329412	6jnl	MG
XP_022094842.1	0.265957	6tly	ZN
XP_022094842.1	0.265957	6tly	ZN
XP_022094842.1	0.265957	6tly	ZN
XP_022094842.1	0.265957	6tly	ZN
XP_022094842.1	0.319588	3pfq	ZN
XP_022106308.1	0.298561	2hd5	ZN
XP_022106308.1	0.298561	5xu8	DX4
XP_022106308.1	0.298561	5xu8	NA
XP_022106308.1	0.298561	5xu8	NA
XP_022106308.1	0.348837	5xu8	NA
XP_022106308.1	0.298561	2ibi	NEH
XP_022106308.1	0.271739	6cpm	CA
XP_022106308.1	0.271739	6cpm	CA
XP_022106308.1	0.271739	6cpm	NA
XP_022106308.1	0.271739	6cpm	CA
XP_022106308.1	0.271739	6cpm	NA
XP_022106308.1	0.271739	6ml1	CA
XP_022106308.1	0.271739	6ml1	NA
XP_022106308.1	0.339744	6ml1	NA
XP_022106308.1	0.271739	6ml1	CA
XP_022106308.1	0.271739	6ml1	NA
XP_022106308.1	0.36	6gh9	MIX
XP_022106308.1	0.36	7r2g	MIX
XP_022106308.1	0.36	7r2g	MIX
XP_022106308.1	0.267241	3m99	ZN
XP_022106308.1	0.267241	3m99	ZN
XP_022106308.1	0.256809	5ohk	AYE
XP_022106308.1	0.285714	5cht	ZN
XP_022106308.1	0.304348	5jtj	CA
XP_022106308.1	0.304348	5kyc	MLA
XP_022106308.1	0.304348	5vsk	ZN
XP_022106308.1	0.304348	5vsk	ZN
XP_022106308.1	0.255556	3ihp	ZN
XP_022106308.1	0.27	1ck1	ZN
XP_022106308.1	0.283019	4xdz	NDP
XP_022106308.1	0.283019	4xdz	MG
XP_022106308.1	0.283019	5e4r	NAP
XP_022082300.1	0.355091	5ezv	STU
XP_022082300.1	0.369822	6gvx	TAK
XP_022082300.1	0.369822	6gvx	TAK
XP_022082300.1	0.380665	4bfm	ATP
XP_022082300.1	0.372372	5m5a	NA
XP_022082300.1	0.408922	3aqv	TAK
XP_022082300.1	0.396491	4czt	CPS
XP_022082300.1	0.396491	4czt	CPS
XP_022082300.1	0.396491	4czt	CPS
XP_022082300.1	0.396491	4czt	CPS
XP_022082300.1	0.396491	4czt	CPS
XP_022082300.1	0.396491	4czt	CPS
XP_022082300.1	0.396491	4czt	CPS
XP_022082300.1	0.392982	4czu	CPS
XP_022082300.1	0.392982	4czu	CPS
XP_022082300.1	0.348921	3lij	MG
XP_022082300.1	0.362963	3igo	SRT
XP_022082300.1	0.362963	4y5q	AMP
XP_022082300.1	0.347368	3q5i	CA
XP_022082300.1	0.347368	3q5i	MG
XP_022082300.1	0.328671	2j90	IZA
XP_022082300.1	0.365385	3uc3	CO
XP_022082300.1	0.365385	3uc3	CO
XP_022082300.1	0.365385	3uc3	CO
XP_022082300.1	0.374532	4ysj	ADP
XP_022082300.1	0.374532	4yuq	KS1
XP_022082300.1	0.337079	3bqr	PGO
XP_022082300.1	0.337079	3bqr	PGO
XP_022082300.1	0.337079	5a6n	PGO
XP_022092807.1	0.388704	2z73	RET
XP_022092807.1	0.269103	1gzm	PEF
XP_022092807.1	0.269103	1gzm	C8E
XP_022092807.1	0.269103	1gzm	C8E
XP_022092807.1	0.269103	1gzm	C8E
XP_022092807.1	0.269103	1gzm	C8E
XP_022092807.1	0.269103	1gzm	C8E
XP_022092807.1	0.269103	1gzm	C8E
XP_022092807.1	0.269103	1gzm	ZN
XP_022092807.1	0.269103	1gzm	C8E
XP_022092807.1	0.269103	1gzm	C8E
XP_022092807.1	0.269103	1gzm	C8E
XP_022092807.1	0.269103	1gzm	PEF
XP_022092807.1	0.269103	1gzm	C8E
XP_022092807.1	0.269103	3oax	ZN
XP_022092807.1	0.269103	3oax	ZN
XP_022092807.1	0.269103	3oax	HTO
XP_022092807.1	0.269103	6pgs	64Z
XP_022092807.1	0.269103	7zbc	DAO
XP_022092807.1	0.269103	2x72	PEF
XP_022092807.1	0.269103	2x72	RET
XP_022092807.1	0.269103	2x72	LPP
XP_022092807.1	0.260726	6b73	CLR
XP_022092807.1	0.260726	6vi4	CLR
XP_022092807.1	0.268657	4dkl	MPG
XP_022092807.1	0.268657	4dkl	MPG
XP_022092807.1	0.267016	4ea3	OLB
XP_022092807.1	0.306878	6rz4	NA
XP_022092807.1	0.254019	7jni	HEZ
XP_022092807.1	0.256579	3pwh	ZMA
XP_022092807.1	0.259016	3vg9	ZMA
XP_022092807.1	0.259016	3vg9	STE
XP_022092807.1	0.259016	3vg9	STE
XP_022092807.1	0.259016	3vg9	STE
XP_022092807.1	0.259016	3vg9	STE
XP_022092807.1	0.259016	3vg9	STE
XP_022092807.1	0.259016	3vg9	STE
XP_022092807.1	0.259016	8gng	K
XP_022092807.1	0.259016	5g53	NEC
XP_022094662.1	0.320755	4wfa	MG
XP_022094662.1	0.320755	5hl7	MN
XP_022092231.1	0.281553	3ncc	NA
XP_022092231.1	0.281553	3ncc	NA
XP_022092231.1	0.281553	3ncc	NA
XP_022092231.1	0.281553	3nce	NA
XP_022092231.1	0.281553	3d48	CO3
XP_022092231.1	0.281553	3d48	CO3
XP_022092231.1	0.281553	3d48	CO3
XP_022101867.1	0.487427	3d45	GDP
XP_022101867.1	0.487427	3d45	GDP
XP_022101867.1	0.2657	3irp	K
XP_022101867.1	0.2657	3irp	K
XP_022105284.1	0.344086	4zph	PRL
XP_022105284.1	0.340206	7vnh	BHF
XP_022105284.1	0.282759	5nj8	ER3
XP_022105284.1	0.282759	5nj8	ER3
XP_022105284.1	0.282759	5nj8	ER3
XP_022100335.1	0.337054	2xud	DME
XP_022100335.1	0.337054	2xuf	TZ4
XP_022100335.1	0.337054	2xui	TZ5
XP_022100335.1	0.337054	2xup	SO3
XP_022100335.1	0.320628	1maa	DME
XP_022100335.1	0.320628	1maa	DME
XP_022100335.1	0.320628	1maa	DME
XP_022100335.1	0.315673	2c0q	NTJ
XP_022100335.1	0.315673	2whr	CO3
XP_022100335.1	0.315673	4b80	P4C
XP_022100335.1	0.315673	5foq	P15
XP_022100335.1	0.315673	5ov9	ETX
XP_022100335.1	0.315673	5ov9	CVI
XP_022100335.1	0.315673	5ov9	CVI
XP_022100335.1	0.315673	5ov9	AE3
XP_022100335.1	0.315673	5ov9	ETX
XP_022100335.1	0.317673	1j06	CO3
XP_022100335.1	0.317673	1j06	AE3
XP_022100335.1	0.317673	1j06	AE3
XP_022100335.1	0.317673	1q84	TZ4
XP_022100335.1	0.317673	2gyu	HI6
XP_022100335.1	0.317673	2ha3	CHT
XP_022100335.1	0.317673	2ha3	CHT
XP_022100335.1	0.317673	2ha3	CHT
XP_022100335.1	0.317673	5eie	7PG
XP_022100335.1	0.317673	6fsd	TOE
XP_022100335.1	0.317673	6fsd	1PG
XP_022100335.1	0.317673	6td2	ETE
XP_022100335.1	0.317673	7qak	TOE
XP_022100335.1	0.317673	7qyn	TOE
XP_022100335.1	0.313466	2whq	HI6
XP_022100335.1	0.313466	2y2v	ME2
XP_022100335.1	0.313466	2y2v	ME2
XP_022100335.1	0.313466	5fpp	AE3
XP_022100335.1	0.315436	2ha4	ACH
XP_022100335.1	0.315436	2ha4	ACH
XP_022100335.1	0.315436	2ha4	ACH
XP_022100335.1	0.315436	2ha5	AT3
XP_022100335.1	0.315436	2ha5	ETM
XP_022100335.1	0.315436	2ha5	AT3
XP_022100335.1	0.315436	2ha5	ETM
XP_022100335.1	0.315436	2ha5	AT3
XP_022100335.1	0.315436	2ha7	BUA
XP_022100335.1	0.315436	3zlu	1KA
XP_022100335.1	0.315436	3zlu	1KA
XP_022100335.1	0.315436	3zlu	1KA
XP_022100335.1	0.315436	3zlv	HI6
XP_022100335.1	0.315436	3zlv	1KA
XP_022100335.1	0.315436	7r0a	TOE
XP_022100335.1	0.315436	7r2f	7PG
XP_022100335.1	0.32809	3o9m	BEZ
XP_022100335.1	0.330296	6esy	TFX
XP_022100335.1	0.330296	6esy	TFX
XP_022100335.1	0.328018	1xlu	ISP
XP_022100335.1	0.328018	1xlw	DEP
XP_022100335.1	0.328018	2wif	NA
XP_022100335.1	0.328018	2xqf	VX
XP_022100335.1	0.328018	2xqg	CA
XP_022100335.1	0.328018	2xqg	CA
XP_022100335.1	0.328018	2xqg	CA
XP_022100335.1	0.328018	2xqi	NA
XP_022100335.1	0.328018	2xqi	NA
XP_022100335.1	0.328018	2xqi	NA
XP_022100335.1	0.328018	2xqj	CA
XP_022100335.1	0.328018	2xqj	CA
XP_022092232.1	0.536842	2ooq	B3P
XP_022092232.1	0.423358	2ooq	B3P
XP_022092232.1	0.536842	2ooq	NA
XP_022092232.1	0.536842	2ooq	B3P
XP_022092232.1	0.423358	2ooq	NA
XP_022092232.1	0.423358	2ooq	B3P
XP_022092232.1	0.522876	3qcc	VO4
XP_022092232.1	0.530822	2h4v	NA
XP_022092232.1	0.467626	2yd9	B3P
XP_022092232.1	0.431579	2i5x	MG
XP_022092232.1	0.429066	2ahs	NA
XP_022092232.1	0.44856	2ahs	NA
XP_022092232.1	0.450704	2cfv	NI
XP_022092232.1	0.424561	2h03	MG
XP_022092232.1	0.424561	2h03	MG
XP_022092232.1	0.44856	2h03	MG
XP_022092232.1	0.44856	2h03	MG
XP_022092232.1	0.424561	2hc2	NA
XP_022092232.1	0.424561	2hc2	NA
XP_022092232.1	0.44856	2hc2	NA
XP_022092232.1	0.44856	2hc2	NA
XP_022092232.1	0.405594	3s3e	1BO
XP_022092232.1	0.405594	3s3e	1BO
XP_022092232.1	0.448276	3s3e	1BO
XP_022092232.1	0.405594	3s3e	BU1
XP_022092232.1	0.405594	3s3e	1BO
XP_022092232.1	0.405594	3s3e	1BO
XP_022092232.1	0.405594	3s3e	1BO
XP_022092232.1	0.405594	3s3e	1BO
XP_022092232.1	0.405594	3s3e	1BO
XP_022092232.1	0.448276	3s3e	BU1
XP_022092232.1	0.448276	3s3e	1BO
XP_022092232.1	0.448276	3s3e	1BO
XP_022092232.1	0.448276	3s3e	1BO
XP_022092232.1	0.448276	3s3e	1BO
XP_022092232.1	0.448276	3s3e	1BO
XP_022092232.1	0.405594	3s3f	1BO
XP_022092232.1	0.448276	3s3f	VO4
XP_022092232.1	0.448276	3s3f	1BO
XP_022092232.1	0.405594	3s3h	1BO
XP_022092232.1	0.405594	3s3h	BU1
XP_022092232.1	0.448276	3s3h	1BO
XP_022092232.1	0.419355	2pi7	NO3
XP_022092232.1	0.439331	2pi7	NO3
XP_022092232.1	0.353887	5ehr	5OD
XP_022092232.1	0.397394	3b7o	MLT
XP_022091577.1	0.667436	4a35	MG
XP_022091577.1	0.667436	4a35	MG
XP_022091577.1	0.538642	4ip4	CO2
XP_022091577.1	0.538642	4ip4	CO2
XP_022091577.1	0.312757	4h19	CA
XP_022091577.1	0.312757	4h19	0YR
XP_022091577.1	0.321168	4h19	0YR
XP_022091577.1	0.313901	2ovl	NA
XP_022091577.1	0.313901	2ovl	NA
XP_022091577.1	0.33526	2pp1	LLH
XP_022091577.1	0.288462	2pp1	LLH
XP_022091577.1	0.269663	3op2	AKG
XP_022091577.1	0.287611	5xd7	MG
XP_022091577.1	0.283186	5xd9	MG
XP_022091577.1	0.348993	4ggb	CA
XP_022091577.1	0.348993	4ggb	CA
XP_022091577.1	0.300578	2og9	CA
XP_022091577.1	0.2875	3toy	P4C
XP_022091577.1	0.2875	3toy	P4C
XP_022091577.1	0.2875	3toy	P4C
XP_022091577.1	0.272727	3rr1	MLT
XP_022091577.1	0.296053	2mnr	MN
XP_022091577.1	0.296053	3uxk	BHO
XP_022091577.1	0.296053	4m6u	TTN
XP_022091577.1	0.296053	6vim	PBC
XP_022086474.1	0.478261	6wq1	ZN
XP_022086474.1	0.497487	8d0v	GSH
XP_022086474.1	0.497487	8czl	GSH
XP_022086474.1	0.256579	8byk	NA
XP_022086474.1	0.256579	8byk	NA
XP_022086474.1	0.292929	4d4c	DMJ
XP_022086474.1	0.292929	4d4d	IFM
XP_022091450.1	0.714286	1oky	STU
XP_022091450.1	0.740351	1h1w	ATP
XP_022091450.1	0.707641	4a07	MG
XP_022091450.1	0.707641	4aw0	MG
XP_022091450.1	0.707641	4aw0	DTD
XP_022091450.1	0.707641	4aw1	MN
XP_022091450.1	0.707641	4aw1	NA
XP_022091450.1	0.707641	4aw1	NA
XP_022091450.1	0.707641	5ack	NA
XP_022091450.1	0.707641	5lvm	ADE
XP_022091450.1	0.707641	5lvn	ADN
XP_022091450.1	0.69103	4ct2	NA
XP_022091450.1	0.378613	2r5t	MG
XP_022091450.1	0.389313	1q24	MG
XP_022091450.1	0.389313	1q8u	H52
XP_022091450.1	0.389313	1q8u	H52
XP_022091450.1	0.389313	1q8w	M77
XP_022091450.1	0.389313	2gfc	OCT
XP_022091450.1	0.389313	3zo1	MOH
XP_022091450.1	0.389313	3zo3	MOH
XP_022091450.1	0.389313	3zo3	MOH
XP_022091450.1	0.389313	3zo3	MOH
XP_022091450.1	0.389313	4c38	MOH
XP_022091450.1	0.389313	4c38	MOH
XP_022091450.1	0.375451	3fhi	MN
XP_022091450.1	0.389313	3ovv	BUD
XP_022091450.1	0.389313	4wb7	ZN
XP_022091450.1	0.389313	4wb7	ZN
XP_022091450.1	0.389313	4wb7	ZN
XP_022091450.1	0.389313	4wb7	ZN
XP_022091450.1	0.389313	4wb7	ZN
XP_022091450.1	0.389313	4wb7	ZN
XP_022091450.1	0.389313	5lcp	MOH
XP_022091450.1	0.389313	5lcq	MOH
XP_022091450.1	0.389313	5lcr	MOH
XP_022091450.1	0.389313	5lcr	MOH
XP_022091450.1	0.389313	5lct	MOH
XP_022091450.1	0.389313	5lct	MOH
XP_022091450.1	0.389313	5lcu	MOH
XP_022091450.1	0.389313	5lcu	MOH
XP_022091450.1	0.389313	5lcu	MOH
XP_022091450.1	0.389313	5m0u	MOH
XP_022091450.1	0.389313	5m0u	MOH
XP_022091450.1	0.389313	5m0u	MOH
XP_022091450.1	0.389313	5m0u	MOH
XP_022091450.1	0.389313	5m0u	MOH
XP_022091450.1	0.389313	5m71	MOH
XP_022091450.1	0.389313	5n36	F05
XP_022091450.1	0.389313	5n3h	NCA
XP_022091450.1	0.389313	5n3k	GGB
XP_022091450.1	0.389313	5n3n	152
XP_022091450.1	0.389313	5n3q	3AB
XP_022091450.1	0.389313	5n3q	3AB
XP_022091450.1	0.389313	5n3s	HBD
XP_022091450.1	0.389313	6eh2	AMP
XP_022091450.1	0.389313	6em6	ADP
XP_022095226.1	0.285714	3icr	COA
XP_022095226.1	0.25	6ku1	MG
XP_022095226.1	0.25	6kvw	CA
XP_022095226.1	0.25	6kvw	AVJ
XP_022095226.1	0.25	6kvw	AVJ
XP_022093276.1	0.325581	1l9c	FAD
XP_022093276.1	0.325581	1l9d	PYC
XP_022093276.1	0.325581	1el5	DMG
XP_022093276.1	0.325581	1el7	TE
XP_022093276.1	0.325581	1eli	PYC
XP_022093276.1	0.325581	2a89	FCG
XP_022093276.1	0.325581	2gf3	FOA
XP_022093276.1	0.325581	2gf3	FOA
XP_022093276.1	0.263736	2oln	NA
XP_022093276.1	0.263736	2oln	6PC
XP_022093276.1	0.261364	2uzz	NA
XP_022093276.1	0.305263	2gag	FAD
XP_022093276.1	0.305263	2gag	FMN
XP_022111084.1	0.377704	3thd	DGJ
XP_022111084.1	0.377704	3wez	N8V
XP_022111084.1	0.358974	5gsm	B3P
XP_022111084.1	0.337278	7vkz	NOJ
XP_022111084.1	0.337278	7x87	CA
XP_022086423.1	0.680556	1zaj	M2P
XP_022086423.1	0.680556	2qut	13P
XP_022086423.1	0.680556	5tlh	MDN
XP_022086423.1	0.717718	3bv4	13P
XP_022086423.1	0.551532	5tk3	G3H
XP_022086423.1	0.551532	5tkl	P6F
XP_022086423.1	0.452229	3qrh	G3H
XP_022085537.1	0.601173	3e77	PLP
XP_022085537.1	0.601173	3e77	PLP
XP_022085537.1	0.601173	8a5v	PMP
XP_022085537.1	0.601173	8a5v	PMP
XP_022085537.1	0.469208	3qm2	CA
XP_022085537.1	0.466276	7t7j	PLP
XP_022085537.1	0.466276	7t7j	PLP
XP_022085537.1	0.430678	6xdk	CA
XP_022085537.1	0.428571	1w23	MG
XP_022085537.1	0.428571	1w23	MG
XP_022085537.1	0.428571	1w23	MG
XP_022085537.1	0.428571	4azj	NA
XP_022085537.1	0.428571	4azj	NA
XP_022090872.1	0.322835	6pog	CA
XP_022090872.1	0.322835	6pog	CA
XP_022090872.1	0.322835	6pog	CA
XP_022090872.1	0.346614	6pog	CA
XP_022090872.1	0.346614	6pog	CA
XP_022090872.1	0.346614	6pog	CA
XP_022090872.1	0.328205	6pog	CA
XP_022090872.1	0.328205	6pog	CA
XP_022090872.1	0.328205	6pog	CA
XP_022090872.1	0.341346	5uk5	CA
XP_022090872.1	0.354839	5uk5	CA
XP_022090872.1	0.354839	5uk5	CA
XP_022090872.1	0.341667	5uk5	CA
XP_022090872.1	0.256131	3m0c	CA
XP_022090872.1	0.256131	3m0c	CA
XP_022090872.1	0.395161	6pol	NO3
XP_022090872.1	0.395161	6pol	NO3
XP_022090872.1	0.395161	6pol	NO3
XP_022090872.1	0.395161	6pol	NO3
XP_022090872.1	0.382609	6pol	NO3
XP_022090872.1	0.382609	6pol	NO3
XP_022090872.1	0.346457	6pol	NO3
XP_022090872.1	0.346457	6pol	NO3
XP_022090872.1	0.346457	6pol	NO3
XP_022090872.1	0.346457	6pol	NO3
XP_022090872.1	0.333333	6pol	NO3
XP_022090872.1	0.333333	6pol	NO3
XP_022090872.1	0.333333	6pol	NO3
XP_022090872.1	0.395161	6pol	NO3
XP_022090872.1	0.382609	6pol	NO3
XP_022090872.1	0.346457	6pol	NO3
XP_022090872.1	0.333333	6pol	NO3
XP_022090872.1	0.395161	6pol	NO3
XP_022090872.1	0.395161	6pol	NO3
XP_022090872.1	0.395161	6pol	NO3
XP_022090872.1	0.382609	6pol	NO3
XP_022090872.1	0.346457	6pol	NO3
XP_022090872.1	0.346457	6pol	NO3
XP_022090872.1	0.346457	6pol	NO3
XP_022090872.1	0.333333	6pol	NO3
XP_022090872.1	0.333333	6pol	NO3
XP_022090872.1	0.333333	6pol	NO3
XP_022090872.1	0.390244	2bo2	CA
XP_022090872.1	0.327869	2bo2	CA
XP_022090872.1	0.35	4cuf	CA
XP_022090872.1	0.35	2vj3	NA
XP_022090872.1	0.403361	2vj3	CA
XP_022090872.1	0.403361	2vj3	NA
XP_022090872.1	0.367188	2vj3	CA
XP_022090872.1	0.367188	2vj3	NA
XP_022090872.1	0.368	2vj3	CA
XP_022090872.1	0.368	2vj3	NA
XP_022090872.1	0.35	4cud	CA
XP_022090872.1	0.288344	5fma	CA
XP_022090872.1	0.317881	5fma	CA
XP_022090872.1	0.264901	5fma	CA
XP_022090872.1	0.263374	5b4x	CA
XP_022090872.1	0.263374	5b4x	CA
XP_022090872.1	0.267361	2rhp	CA
XP_022090872.1	0.267361	2rhp	CA
XP_022090872.1	0.267361	2rhp	CA
XP_022090872.1	0.267361	2rhp	CA
XP_022090872.1	0.267361	2rhp	CA
XP_022090872.1	0.267361	2rhp	CA
XP_022090872.1	0.267361	2rhp	CA
XP_022090872.1	0.267361	2rhp	CA
XP_022090872.1	0.267361	2rhp	CA
XP_022090872.1	0.267361	2rhp	CA
XP_022090872.1	0.267361	2rhp	CA
XP_022090872.1	0.25	2rhp	CA
XP_022090872.1	0.25	2rhp	CA
XP_022090872.1	0.25	2rhp	CA
XP_022090872.1	0.25	2rhp	CA
XP_022090872.1	0.25	2rhp	CA
XP_022090872.1	0.25	2rhp	CA
XP_022090872.1	0.267361	1yo8	CA
XP_022090872.1	0.267361	1yo8	CA
XP_022090872.1	0.316901	3p5c	CA
XP_022090872.1	0.316901	3p5c	CA
XP_022090872.1	0.322581	3p5c	CA
XP_022090872.1	0.273292	4c16	CA
XP_022090872.1	0.273292	6eyi	CA
XP_022090872.1	0.286765	6eyi	CA
XP_022090872.1	0.271676	6eyi	CA
XP_022090872.1	0.347107	5to3	K
XP_022090872.1	0.296296	5to3	K
XP_022090872.1	0.315068	5to3	K
XP_022090872.1	0.285714	1p0s	MG
XP_022090872.1	0.26	4lmf	CA
XP_022090872.1	0.26	4lmf	NA
XP_022090872.1	0.26	4lor	CA
XP_022090872.1	0.26	6f1c	CA
XP_022090872.1	0.277778	5cis	CA
XP_022090872.1	0.261364	4ylq	TMA
XP_022090872.1	0.261364	4ylq	TMA
XP_022090872.1	0.278261	5ckq	CA
XP_022090630.1	0.451737	2q9f	HEM
XP_022090630.1	0.451737	2q9f	C3S
XP_022090630.1	0.451737	3mdt	VOR
XP_022090630.1	0.451737	3mdv	CL6
XP_022090630.1	0.451737	4fia	198
XP_022090630.1	0.451737	4j14	X2N
XP_022090630.1	0.286041	6h1l	DIO
XP_022090630.1	0.286041	6h1s	TPF
XP_022090630.1	0.286041	6h1t	MPO
XP_022090630.1	0.286041	7wy3	SYN
XP_022090630.1	0.27991	5e78	CO
XP_022090630.1	0.27991	2x7y	ZN
XP_022090630.1	0.27991	2x7y	ZN
XP_022090630.1	0.27991	7egn	HOA
XP_022090630.1	0.27991	7wdh	IPH
XP_022090630.1	0.27991	7wdh	IPH
XP_022090630.1	0.27991	7wdh	IPH
XP_022090630.1	0.27991	7wdh	IPH
XP_022090630.1	0.27991	7wdh	IPH
XP_022090630.1	0.283753	7wde	SYN
XP_022090630.1	0.283753	7wde	SYN
XP_022090630.1	0.283753	7wde	SYN
XP_022090630.1	0.283753	7wde	SYN
XP_022090630.1	0.283753	7wdg	IPH
XP_022090630.1	0.283753	7wdg	IPH
XP_022090630.1	0.283753	1fag	PAM
XP_022090630.1	0.283753	1jpz	140
XP_022090630.1	0.283753	2j1m	ZN
XP_022090630.1	0.283753	2j1m	ZN
XP_022090630.1	0.283753	4zfa	NI
XP_022090630.1	0.283753	4zfa	NI
XP_022090630.1	0.283753	4zfa	NI
XP_022090630.1	0.283753	5xa3	PHQ
XP_022090630.1	0.283753	6jlv	WAA
XP_022090630.1	0.283753	6k9s	CMO
XP_022090630.1	0.283753	7con	3CN
XP_022090630.1	0.283753	7coo	HAI
XP_022090630.1	0.283753	7cx6	QSC
XP_022090630.1	0.283753	7d0u	NEH
XP_022090630.1	0.283753	7d1f	NME
XP_022090630.1	0.283753	7wdd	SYN
XP_022090630.1	0.283753	7wdd	SYN
XP_022090630.1	0.283753	7wdd	SYN
XP_022085883.1	0.258741	3na7	MG
XP_022085883.1	0.252525	6ec0	CO
XP_022094683.1	0.650376	2y1h	ZN
XP_022094683.1	0.650376	2y1h	NI
XP_022094683.1	0.650376	2y1h	NI
XP_022094683.1	0.642857	2y1h	ZN
XP_022094683.1	0.642857	2y1h	NI
XP_022094683.1	0.642857	2y1h	NI
XP_022094683.1	0.642857	2y1h	ZN
XP_022094683.1	0.642857	2y1h	NI
XP_022094683.1	0.642857	2y1h	NI
XP_022094683.1	0.338182	2gzx	NI
XP_022094683.1	0.341818	2gzx	NI
XP_022094683.1	0.341818	2gzx	NI
XP_022094683.1	0.338182	2gzx	NI
XP_022094683.1	0.337079	6l25	NI
XP_022094683.1	0.292776	1zzm	ZN
XP_022094683.1	0.292776	1zzm	ZN
XP_022094683.1	0.288973	1zzm	ZN
XP_022094683.1	0.280899	1xwy	ZN
XP_022094683.1	0.284644	1xwy	ZN
XP_022094683.1	0.284644	1xwy	ZN
XP_022094683.1	0.275862	3gg7	MN
XP_022094683.1	0.275862	3gg7	MN
XP_022094683.1	0.275862	3gg7	MN
XP_022094683.1	0.336634	3guw	ZN
XP_022094683.1	0.253659	3guw	ZN
XP_022094683.1	0.256039	3e2v	MG
XP_022094683.1	0.256039	3e2v	MG
XP_022085356.1	0.259843	3aco	CA
XP_022081910.1	0.283186	4of8	NA
XP_022081910.1	0.313043	7lu6	NA
XP_022081910.1	0.26087	6rlo	NA
XP_022081910.1	0.26087	6rlo	NA
XP_022081910.1	0.27673	3ks0	HEM
XP_022081910.1	0.26875	6oz3	NA
XP_022084132.1	0.276817	7x1x	NAD
XP_022084132.1	0.276817	7x2y	3HB
XP_022084132.1	0.281106	6a3g	NAI
XP_022084132.1	0.27957	2glx	NDP
XP_022084132.1	0.25974	5a02	NAP
XP_022084132.1	0.25974	5a03	DIO
XP_022084132.1	0.25974	5a04	DIO
XP_022084132.1	0.25974	5a04	DIO
XP_022084132.1	0.25974	5a04	DIO
XP_022084132.1	0.25	4had	NA
XP_022084132.1	0.25	4had	NA
XP_022084132.1	0.281385	5ya8	INS
XP_022084132.1	0.256757	1h6c	SIN
XP_022084132.1	0.312057	4iq0	K
XP_022084132.1	0.300699	5b3v	BLA
XP_022084132.1	0.262295	3rc1	TLO
XP_022098637.1	0.296625	7dk8	AMP
XP_022098637.1	0.278547	5kod	IAC
XP_022098637.1	0.256732	4eq4	SAL
XP_022098637.1	0.256732	4ewv	APC
XP_022098637.1	0.256732	4ewv	MN
XP_022098637.1	0.256732	4ewv	APC
XP_022098637.1	0.256732	4l39	MG
XP_022098637.1	0.256732	6oms	ISJ
XP_022098637.1	0.321839	6avh	AMP
XP_022098637.1	0.321839	6avh	AMP
XP_022096664.1	0.265487	4tr2	CA
XP_022109170.1	0.296954	5nv9	NA
XP_022109170.1	0.296954	5nv9	NA
XP_022109170.1	0.317881	3dh4	ER3
XP_022080391.1	0.347938	4fu4	ZN
XP_022080391.1	0.347938	4fu4	ZN
XP_022080391.1	0.347938	4fu4	CA
XP_022080391.1	0.347938	4fu4	CA
XP_022080391.1	0.347938	4fu4	CA
XP_022080391.1	0.347938	4fu4	CA
XP_022080391.1	0.347938	4fvl	CA
XP_022080391.1	0.347938	4fvl	PGO
XP_022080391.1	0.347938	4fvl	PGO
XP_022080391.1	0.347938	4fvl	PGO
XP_022080391.1	0.347938	4fvl	PGO
XP_022080391.1	0.347938	4fvl	PGO
XP_022080391.1	0.347938	4fvl	PGO
XP_022080391.1	0.347938	4fvl	PGO
XP_022080391.1	0.347938	4fvl	PGO
XP_022080391.1	0.347938	4fvl	PGO
XP_022080391.1	0.347938	4fvl	PGO
XP_022080391.1	0.347938	4fvl	PGO
XP_022080391.1	0.347938	4fvl	PGO
XP_022080391.1	0.347938	4fvl	PGO
XP_022080391.1	0.347938	4fvl	PGO
XP_022080391.1	0.347938	4fvl	PGO
XP_022080391.1	0.347938	4fvl	PGO
XP_022080391.1	0.347938	4fvl	PGO
XP_022080391.1	0.347938	4fvl	PGO
XP_022080391.1	0.347938	4fvl	PGO
XP_022080391.1	0.347938	4fvl	PGO
XP_022080391.1	0.347938	4fvl	PGO
XP_022080391.1	0.347938	4fvl	PGO
XP_022080391.1	0.347938	4fvl	PGO
XP_022080391.1	0.347938	4fvl	PGO
XP_022080391.1	0.347938	4fvl	PGO
XP_022080391.1	0.347938	4fvl	PGO
XP_022080391.1	0.347938	4g0d	PGO
XP_022080391.1	0.347938	4g0d	PGO
XP_022080391.1	0.347938	4g0d	PGO
XP_022080391.1	0.347938	4g0d	PGO
XP_022080391.1	0.347938	4g0d	PGO
XP_022080391.1	0.347938	4g0d	PGO
XP_022080391.1	0.347938	4g0d	CA
XP_022080391.1	0.347938	4g0d	PGO
XP_022080391.1	0.347938	4g0d	PGO
XP_022080391.1	0.347938	4g0d	PGO
XP_022080391.1	0.347938	4g0d	PGO
XP_022080391.1	0.347938	4g0d	CA
XP_022080391.1	0.347938	4g0d	PGO
XP_022080391.1	0.347938	4g0d	PGO
XP_022080391.1	0.347938	4g0d	PGO
XP_022080391.1	0.347938	4g0d	PGO
XP_022080391.1	0.347938	4g0d	PGO
XP_022080391.1	0.347938	4g0d	PGO
XP_022080391.1	0.347938	4g0d	PGO
XP_022080391.1	0.347938	4g0d	PGO
XP_022080391.1	0.347938	4g0d	PGO
XP_022080391.1	0.335135	3ba0	ZN
XP_022080391.1	0.335135	3ba0	HAE
XP_022080391.1	0.47486	4jp4	NA
XP_022080391.1	0.480226	2d1n	ZN
XP_022080391.1	0.480226	2ow9	HAE
XP_022080391.1	0.480226	2yig	NA
XP_022080391.1	0.480226	3elm	CA
XP_022080391.1	0.480226	3kek	CA
XP_022080391.1	0.480226	4l19	ZN
XP_022080391.1	0.389513	5ue3	CA
XP_022080391.1	0.468927	7xgj	CA
XP_022080391.1	0.468927	7xjo	B3P
XP_022080391.1	0.468927	8h78	2HP
XP_022080391.1	0.505882	3dpf	HAE
XP_022080391.1	0.31	1ck7	NA
XP_022080391.1	0.464286	1os2	CA
XP_022080391.1	0.464286	1rmz	NGH
XP_022080391.1	0.464286	1utt	CA
XP_022080391.1	0.464286	4efs	PGR
XP_022080391.1	0.464286	4efs	PGO
XP_022080391.1	0.464286	4efs	PGO
XP_022080391.1	0.464286	4h49	PGO
XP_022080391.1	0.464286	4h49	PGO
XP_022080391.1	0.464286	4h76	PGO
XP_022080391.1	0.464286	4h76	PGO
XP_022080391.1	0.464286	4h76	PGO
XP_022080391.1	0.464286	4h84	PGO
XP_022080391.1	0.464286	4h84	PGR
XP_022080391.1	0.464286	4h84	PGO
XP_022080391.1	0.464286	4h84	PGO
XP_022080391.1	0.464286	4h84	PGO
XP_022080391.1	0.464286	4h84	PGO
XP_022080391.1	0.464286	5i0l	PGO
XP_022080391.1	0.464286	6ela	DIO
XP_022080391.1	0.464286	6ela	DIO
XP_022080391.1	0.464286	7ovy	PGR
XP_022080391.1	0.458333	5i3m	DIO
XP_022080391.1	0.458333	5i43	PGO
XP_022080391.1	0.458333	5i43	PGO
XP_022080391.1	0.458333	5i43	PGO
XP_022080391.1	0.461538	4h2e	BCN
XP_022080391.1	0.461538	4h2e	BCN
XP_022080391.1	0.461538	4h2e	BCN
XP_022100618.1	0.391304	4wb7	ZN
XP_022089632.1	0.722433	3hb0	MG
XP_022089632.1	0.722433	3hb1	AF3
XP_022089632.1	0.379121	6t69	ZN
XP_022098761.1	0.288889	4ayo	CA
XP_022098761.1	0.288889	4ayo	NA
XP_022098761.1	0.288889	4ayq	MVL
XP_022098761.1	0.288889	5meh	DMJ
XP_022098761.1	0.288889	5ne5	KIF
XP_022098761.1	0.323529	1nxc	CA
XP_022098761.1	0.31203	5kkb	1PS
XP_022098761.1	0.323529	5kkb	LA
XP_022098761.1	0.323529	5kkb	BU1
XP_022098761.1	0.322917	1x9d	BU1
XP_022098761.1	0.322917	5kij	BU1
XP_022098761.1	0.322917	5kij	BU1
XP_022098761.1	0.322917	5kij	1PS
XP_022098761.1	0.455446	5kij	BU1
XP_022098761.1	0.322917	5kk7	BU1
XP_022098761.1	0.322917	5kk7	1PS
XP_022080341.1	0.283871	6lw5	CLR
XP_022080341.1	0.255172	4ea3	OLB
XP_022080341.1	0.262857	7f61	CLR
XP_022080341.1	0.268456	7k15	NA
XP_022080341.1	0.25	6h7j	5FW
XP_022080341.1	0.25	6h7j	NA
XP_022080341.1	0.25	6h7j	2CV
XP_022080341.1	0.25	6h7j	2CV
XP_022080341.1	0.25	6h7j	2CV
XP_022080341.1	0.25	6h7j	2CV
XP_022080341.1	0.25	6h7j	2CV
XP_022080341.1	0.25	6h7l	2CV
XP_022080341.1	0.25	6h7l	2CV
XP_022080341.1	0.25	6h7l	2CV
XP_022080341.1	0.25	6h7o	P32
XP_022079404.1	0.39548	4fu4	ZN
XP_022079404.1	0.39548	4fu4	ZN
XP_022079404.1	0.39548	4fu4	CA
XP_022079404.1	0.39548	4fu4	CA
XP_022079404.1	0.39548	4fu4	CA
XP_022079404.1	0.39548	4fu4	CA
XP_022079404.1	0.39548	4fvl	CA
XP_022079404.1	0.39548	4fvl	PGO
XP_022079404.1	0.39548	4fvl	PGO
XP_022079404.1	0.39548	4fvl	PGO
XP_022079404.1	0.39548	4fvl	PGO
XP_022079404.1	0.39548	4fvl	PGO
XP_022079404.1	0.39548	4fvl	PGO
XP_022079404.1	0.39548	4fvl	PGO
XP_022079404.1	0.39548	4fvl	PGO
XP_022079404.1	0.39548	4fvl	PGO
XP_022079404.1	0.39548	4fvl	PGO
XP_022079404.1	0.39548	4fvl	PGO
XP_022079404.1	0.39548	4fvl	PGO
XP_022079404.1	0.39548	4fvl	PGO
XP_022079404.1	0.39548	4fvl	PGO
XP_022079404.1	0.39548	4fvl	PGO
XP_022079404.1	0.39548	4fvl	PGO
XP_022079404.1	0.39548	4fvl	PGO
XP_022079404.1	0.39548	4fvl	PGO
XP_022079404.1	0.39548	4fvl	PGO
XP_022079404.1	0.39548	4fvl	PGO
XP_022079404.1	0.39548	4fvl	PGO
XP_022079404.1	0.39548	4fvl	PGO
XP_022079404.1	0.39548	4fvl	PGO
XP_022079404.1	0.39548	4fvl	PGO
XP_022079404.1	0.39548	4fvl	PGO
XP_022079404.1	0.39548	4g0d	PGO
XP_022079404.1	0.39548	4g0d	PGO
XP_022079404.1	0.39548	4g0d	PGO
XP_022079404.1	0.39548	4g0d	PGO
XP_022079404.1	0.39548	4g0d	PGO
XP_022079404.1	0.39548	4g0d	CA
XP_022079404.1	0.39548	4g0d	PGO
XP_022079404.1	0.39548	4g0d	PGO
XP_022079404.1	0.39548	4g0d	PGO
XP_022079404.1	0.39548	4g0d	PGO
XP_022079404.1	0.39548	4g0d	CA
XP_022079404.1	0.39548	4g0d	PGO
XP_022079404.1	0.39548	4g0d	PGO
XP_022079404.1	0.39548	4g0d	PGO
XP_022079404.1	0.39548	4g0d	PGO
XP_022079404.1	0.39548	4g0d	PGO
XP_022079404.1	0.39548	4g0d	PGO
XP_022079404.1	0.39548	4g0d	PGO
XP_022079404.1	0.39548	4g0d	PGO
XP_022079404.1	0.36	3ba0	HAE
XP_022079404.1	0.372159	2clt	CA
XP_022079404.1	0.342105	1ck7	NA
XP_022079404.1	0.484472	7xgj	CA
XP_022079404.1	0.484472	7xjo	B3P
XP_022079404.1	0.484472	8h78	2HP
XP_022079404.1	0.484663	2d1n	ZN
XP_022079404.1	0.484663	2ow9	HAE
XP_022079404.1	0.484663	2yig	NA
XP_022079404.1	0.484663	2yig	NA
XP_022079404.1	0.484663	3kek	CA
XP_022079404.1	0.484663	4l19	ZN
XP_022079404.1	0.47561	1q3a	NGH
XP_022079404.1	0.47561	1q3a	NGH
XP_022079404.1	0.47561	1q3a	NGH
XP_022079404.1	0.47561	1q3a	NGH
XP_022079404.1	0.440994	1hv5	CPS
XP_022079404.1	0.440994	1hv5	CPS
XP_022079404.1	0.440994	1hv5	CPS
XP_022079404.1	0.440994	1hv5	CPS
XP_022079404.1	0.459627	3shi	CA
XP_022079404.1	0.398964	5ue3	CA
XP_022079404.1	0.45679	3dpf	HAE
XP_022079404.1	0.459627	6ela	DIO
XP_022079404.1	0.459627	6ela	DIO
XP_022079404.1	0.459627	1os2	CA
XP_022079404.1	0.459627	4efs	PGR
XP_022079404.1	0.459627	4efs	PGO
XP_022079404.1	0.459627	4efs	PGO
XP_022079404.1	0.459627	4h49	PGO
XP_022079404.1	0.459627	4h49	PGO
XP_022079404.1	0.459627	4h76	PGO
XP_022079404.1	0.459627	4h76	PGO
XP_022079404.1	0.459627	4h76	PGO
XP_022079404.1	0.459627	4h84	PGO
XP_022079404.1	0.459627	4h84	PGR
XP_022079404.1	0.459627	4h84	PGO
XP_022079404.1	0.459627	4h84	PGO
XP_022079404.1	0.459627	4h84	PGO
XP_022079404.1	0.459627	4h84	PGO
XP_022079404.1	0.459627	5i0l	PGO
XP_022109961.1	0.276471	6os1	CLR
XP_022109961.1	0.284722	6vi4	CLR
XP_022109961.1	0.275362	6tod	PGW
XP_022109961.1	0.275362	6tod	NA
XP_022109961.1	0.275362	6tod	PGW
XP_022109961.1	0.265734	6akx	NO3
XP_022109961.1	0.281046	4dkl	MPG
XP_022109961.1	0.281046	4dkl	MPG
XP_022109961.1	0.302326	5cxv	0HK
XP_022109961.1	0.302326	5cxv	Y01
XP_022109961.1	0.265487	4u15	TAR
XP_022109961.1	0.265734	4u15	TAR
XP_022109961.1	0.265487	4u15	TAR
XP_022109961.1	0.294574	6wjc	Y01
XP_022109961.1	0.251748	4ea3	OLB
XP_022109961.1	0.303448	4ib4	CLR
XP_022109961.1	0.303448	4ib4	OLB
XP_022109961.1	0.303448	4ib4	OLB
XP_022109961.1	0.303448	4nc3	CLR
XP_022109961.1	0.303448	6drx	CLR
XP_022109961.1	0.321918	4gbr	CAU
XP_022109961.1	0.321918	4lde	NA
XP_022109961.1	0.321918	4lde	1WV
XP_022109961.1	0.321918	4ldo	1WV
XP_022109961.1	0.25	4xnv	CLR
XP_022109961.1	0.25	4xnv	Y01
XP_022109961.1	0.25	4xnv	Y01
XP_022109961.1	0.321918	5jqh	CLR
XP_022109961.1	0.321918	6mxt	MG
XP_022109961.1	0.321918	6mxt	NI
XP_022109961.1	0.269663	3d4s	CLR
XP_022109961.1	0.269663	6ps2	OLB
XP_022109961.1	0.269663	6ps2	OLB
XP_022109961.1	0.269663	6ps2	OLB
XP_022109961.1	0.269663	6ps2	OLB
XP_022092202.1	0.531847	2c2n	AE4
XP_022092202.1	0.531847	2c2n	DXE
XP_022092202.1	0.531847	2c2n	AE3
XP_022092202.1	0.355705	2g2z	COA
XP_022092202.1	0.355705	2g2z	MLA
XP_022092202.1	0.352159	3hjv	CXS
XP_022092202.1	0.352159	3hjv	CXS
XP_022092202.1	0.352159	3hjv	CXS
XP_022092202.1	0.352159	3hjv	CXS
XP_022092202.1	0.352159	3hjv	CXS
XP_022092202.1	0.318792	3r97	NHE
XP_022092202.1	0.27	3im9	CA
XP_022092202.1	0.320946	6apg	CA
XP_022092202.1	0.306569	2qj3	NI
XP_022092202.1	0.306569	2qj3	NI
XP_022092202.1	0.306569	2qj3	NI
XP_022092202.1	0.265574	1nm2	NI
XP_022092202.1	0.274648	7akc	NA
XP_022092202.1	0.263345	7vrs	PNS
XP_022092202.1	0.261224	7agu	DXX
XP_022092202.1	0.289256	5czd	PNS
XP_022092202.1	0.280992	8h6s	MG
XP_022087575.1	0.51634	7opk	MG
XP_022087575.1	0.333333	3pif	MN
XP_022107992.1	0.381443	7tx9	CA
XP_022107992.1	0.381443	7tx9	CA
XP_022107992.1	0.381443	7tx9	1PG
XP_022107992.1	0.371134	1uov	CA
XP_022107992.1	0.371134	2yoa	CA
XP_022107992.1	0.371134	2yoa	CA
XP_022107992.1	0.371134	4v11	CA
XP_022107992.1	0.371134	5ccg	CA
XP_022107992.1	0.371134	5cci	MG
XP_022107992.1	0.371134	5t0s	NA
XP_022107992.1	0.362832	3hn8	ZN
XP_022107992.1	0.414894	6anj	TBU
XP_022107992.1	0.414894	6anj	TBU
XP_022107992.1	0.414894	6anj	TBU
XP_022107992.1	0.35514	3n5a	CA
XP_022107992.1	0.326316	4rj9	K
XP_022107992.1	0.326316	4rj9	K
XP_022107992.1	0.37234	3f05	MN
XP_022107992.1	0.37234	4wee	NA
XP_022107992.1	0.294118	3gpe	PT5
XP_022107992.1	0.294118	4dnl	NA
XP_022107992.1	0.28125	5lo8	PIO
XP_022107992.1	0.28125	5lo8	PIO
XP_022107992.1	0.28125	5lo8	PIO
XP_022107992.1	0.268908	1a25	CA
XP_022107992.1	0.315789	5a4x	ZN
XP_022107992.1	0.315789	5a50	PC
XP_022107992.1	0.315789	5a50	PC
XP_022107992.1	0.336538	7as6	NI
XP_022107992.1	0.336538	7atp	ZN
XP_022107992.1	0.278351	4np9	I3P
XP_022107992.1	0.278351	4ns0	PIO
XP_022107992.1	0.274725	1w15	CA
XP_022107992.1	0.274725	1w15	NA
XP_022107992.1	0.274725	1w15	NA
XP_022083497.1	0.261084	6h3a	ZN
XP_022083497.1	0.261084	6h3a	ZN
XP_022083497.1	0.261084	6h3a	ZN
XP_022083497.1	0.261084	6h3a	ZN
XP_022083497.1	0.251799	7xt2	ZN
XP_022083497.1	0.251799	7xt2	ZN
XP_022083497.1	0.30303	4ayc	CPQ
XP_022083497.1	0.255814	5din	ZN
XP_022083497.1	0.255814	5din	ZN
XP_022082493.1	0.772586	3g51	ATP
XP_022082493.1	0.303249	3g51	ATP
XP_022082493.1	0.783333	4gue	QCT
XP_022082493.1	0.783333	4gue	MG
XP_022082493.1	0.303249	4gue	QCT
XP_022082493.1	0.303249	4gue	MG
XP_022082493.1	0.744262	6g76	ATP
XP_022082493.1	0.744262	6g76	ZN
XP_022082493.1	0.303502	6g76	ATP
XP_022082493.1	0.303502	6g76	ZN
XP_022082493.1	0.303502	6g77	ATP
XP_022082493.1	0.303502	6g77	ZN
XP_022082493.1	0.672727	4m8t	NA
XP_022082493.1	0.261818	5o1s	NA
XP_022082493.1	0.659016	2wnt	NA
XP_022082493.1	0.525373	4l44	ZN
XP_022082493.1	0.319048	4l44	ZN
XP_022082493.1	0.528662	3a60	STU
XP_022082493.1	0.319048	3a60	STU
XP_022082493.1	0.528662	3a62	MN
XP_022082493.1	0.319048	3a62	MN
XP_022082493.1	0.413174	1o6l	MN
XP_022082493.1	0.413174	1o6l	MN
XP_022082493.1	0.314607	1o6l	MN
XP_022082493.1	0.314607	1o6l	MN
XP_022082493.1	0.417867	2r5t	MG
XP_022082493.1	0.365854	2r5t	MG
XP_022082493.1	0.39255	4ejn	SBT
XP_022082493.1	0.412651	6npz	MN
XP_022082493.1	0.322034	6npz	MN
XP_022082493.1	0.412651	6npz	VO4
XP_022082493.1	0.322034	6npz	MN
XP_022082493.1	0.327273	3cqw	MN
XP_022082493.1	0.398176	4crs	MG
XP_022082493.1	0.321101	4crs	MG
XP_022082493.1	0.330729	4dc2	ADE
XP_022082493.1	0.31068	4dc2	ADE
XP_022082493.1	0.355491	5li1	K
XP_022082493.1	0.355491	5li1	MG
XP_022082493.1	0.315534	5li1	K
XP_022082493.1	0.315534	5li1	MG
XP_022082493.1	0.355491	5lih	ADP
XP_022082493.1	0.355491	5lih	AF3
XP_022082493.1	0.355491	5lih	AF3
XP_022082493.1	0.355491	5lih	MN
XP_022082493.1	0.315534	5lih	ADP
XP_022082493.1	0.315534	5lih	AF3
XP_022082493.1	0.315534	5lih	AF3
XP_022082493.1	0.315534	5lih	MN
XP_022082493.1	0.391437	4q9z	NA
XP_022082493.1	0.325472	4q9z	NA
XP_022082493.1	0.325472	4ra5	NA
XP_022082493.1	0.386986	1l3r	MG
XP_022082493.1	0.337037	1l3r	MG
XP_022082493.1	0.386986	2qcs	TAM
XP_022082493.1	0.337037	2qcs	TAM
XP_022082493.1	0.386986	3x2v	CO3
XP_022082493.1	0.337037	3x2v	CO3
XP_022082493.1	0.386986	4iai	CA
XP_022082493.1	0.386986	4iai	CA
XP_022082493.1	0.337037	4iai	CA
XP_022082493.1	0.337037	4iai	CA
XP_022082493.1	0.386986	4ib0	NA
XP_022082493.1	0.386986	4ib0	NA
XP_022082493.1	0.337037	4ib0	NA
XP_022082493.1	0.337037	4ib0	NA
XP_022082493.1	0.386986	4ib1	K
XP_022082493.1	0.386986	4ib1	K
XP_022082493.1	0.337037	4ib1	K
XP_022082493.1	0.337037	4ib1	K
XP_022082493.1	0.386986	1apm	OCT
XP_022082493.1	0.333333	1apm	OCT
XP_022082493.1	0.386986	1q8u	H52
XP_022082493.1	0.386986	1q8u	H52
XP_022082493.1	0.32526	1q8u	H52
XP_022082493.1	0.32526	1q8u	H52
XP_022082493.1	0.386986	1q8w	M77
XP_022082493.1	0.32526	1q8w	M77
XP_022088174.1	0.258824	3na7	MG
XP_022098994.1	0.444444	5nfj	SAM
XP_022098994.1	0.326087	4jwf	SAH
XP_022098994.1	0.276836	4fmw	K
XP_022080250.1	0.666667	4zzh	ZN
XP_022080250.1	0.666667	4zzj	CNA
XP_022080250.1	0.665625	5btr	STL
XP_022080250.1	0.665625	5btr	STL
XP_022080250.1	0.665625	5btr	STL
XP_022080250.1	0.720588	4if6	APR
XP_022080250.1	0.706522	4i5i	NAD
XP_022080250.1	0.426621	2hjh	NCA
XP_022080250.1	0.412698	3zgv	AR6
XP_022080250.1	0.412698	5fyq	ZN
XP_022080250.1	0.412698	6nr0	NA
XP_022080250.1	0.412698	6nr0	NA
XP_022080250.1	0.419753	6l71	NCA
XP_022080250.1	0.45	4rmj	NA
XP_022080250.1	0.45	5d7p	OCZ
XP_022080250.1	0.45	5d7p	OCZ
XP_022080250.1	0.45	5dy5	BU3
XP_022080250.1	0.45	6qcn	QUE
XP_022080250.1	0.445833	3glt	CO3
XP_022080250.1	0.445833	4bn5	SR7
XP_022080250.1	0.445833	4bv3	NO3
XP_022080250.1	0.445833	4bv3	NA
XP_022080250.1	0.445833	4hd8	PIT
XP_022080250.1	0.445833	5d7n	MG
XP_022080250.1	0.445833	5h4d	MG
XP_022080250.1	0.445833	6iso	CRD
XP_022080250.1	0.355805	2od7	A1R
XP_022080250.1	0.359073	1s7g	ZN
XP_022080250.1	0.359073	1s7g	ZN
XP_022080250.1	0.359073	1s7g	NAD
XP_022080250.1	0.359073	1yc2	NCA
XP_022080250.1	0.359073	1yc2	NCA
XP_022080250.1	0.359073	1yc2	NCA
XP_022080250.1	0.359073	1yc2	NCA
XP_022080250.1	0.373206	2h2g	ZN
XP_022080250.1	0.309804	1ici	ZN
XP_022080250.1	0.305785	4utr	GUA
XP_022080250.1	0.305785	4utr	NA
XP_022080250.1	0.305785	4utx	3NP
XP_022080250.1	0.305785	5ojo	MAH
XP_022080250.1	0.294118	2nyr	SVR
XP_022080250.1	0.294118	2nyr	SVR
XP_022080250.1	0.294118	3rig	NHE
XP_022085337.1	0.451327	4gs4	COA
XP_022085337.1	0.487047	4b5o	NA
XP_022085337.1	0.481865	4b5p	COA
XP_022085337.1	0.481865	4b5p	NA
XP_022082230.1	0.310559	5v3g	ZN
XP_022082230.1	0.310559	5v3g	ZN
XP_022082230.1	0.310559	5v3g	ZN
XP_022082230.1	0.310559	5v3g	ZN
XP_022082230.1	0.310559	5v3g	ZN
XP_022082230.1	0.310559	5v3g	ZN
XP_022082230.1	0.3375	5v3m	ZN
XP_022082230.1	0.322981	5v3j	MG
XP_022082230.1	0.281081	5und	ZN
XP_022082230.1	0.288235	1tf6	ZN
XP_022082230.1	0.29927	7txc	ZN
XP_022082230.1	0.28	6b0r	ZN
XP_022082230.1	0.293478	7eyi	BO3
XP_022082230.1	0.295652	6a57	ZN
XP_022082230.1	0.295652	6a58	ZN
XP_022082230.1	0.288889	4r2e	ZN
XP_022082230.1	0.288889	5kl2	NA
XP_022082230.1	0.285714	5k5i	ZN
XP_022079688.1	0.281818	4ntw	NA
XP_022079688.1	0.281465	5wkv	CA
XP_022079688.1	0.281465	5wkv	CA
XP_022079688.1	0.281465	5wkv	CA
XP_022079688.1	0.281465	5wkv	CA
XP_022079688.1	0.28211	3s3x	K
XP_022079688.1	0.28211	6x9h	NA
XP_022091335.1	0.613636	2iqj	ZN
XP_022091335.1	0.335938	3lvq	GDP
XP_022091335.1	0.335938	3lvq	MG
XP_022091335.1	0.335938	3lvr	CA
XP_022096789.1	0.316176	4gmr	NO3
XP_022096789.1	0.361905	6ob5	FPP
XP_022096789.1	0.376238	6moj	TAR
XP_022096789.1	0.335878	7vxw	URE
XP_022096789.1	0.335878	7vxw	URE
XP_022096789.1	0.335878	7vy4	URE
XP_022096789.1	0.335878	7vy7	URE
XP_022096789.1	0.330357	5lec	B3P
XP_022096789.1	0.362745	5mad	NA
XP_022096789.1	0.361905	5op3	CA
XP_022096789.1	0.342105	5ma5	NA
XP_022096789.1	0.342857	7b4w	CA
XP_022096789.1	0.342857	7b4w	CA
XP_022096789.1	0.404494	1n0q	TFA
XP_022096789.1	0.324074	7b4v	MG
XP_022091997.1	0.415663	4bvx	I3C
XP_022091997.1	0.415663	4bvx	I3C
XP_022091997.1	0.277027	5f0g	NA
XP_022091997.1	0.267857	7rhp	GSH
XP_022091997.1	0.257353	5an1	GSH
XP_022091997.1	0.257353	7so8	GSH
XP_022091997.1	0.257353	7so8	GSH
XP_022091997.1	0.257353	7so8	GSH
XP_022091997.1	0.257353	7so8	GSH
XP_022091997.1	0.257353	7so8	GSH
XP_022091997.1	0.287129	1pd2	GSH
XP_022091997.1	0.287129	5y9z	MG
XP_022091997.1	0.287129	5y9z	MG
XP_022091997.1	0.287129	5y9z	DIO
XP_022091997.1	0.287129	5y9z	DIO
XP_022091997.1	0.287129	5y9z	GSH
XP_022091997.1	0.287129	5y9z	GSH
XP_022091997.1	0.287129	6n69	GSH
XP_022083261.1	0.637255	6ghm	NHE
XP_022083261.1	0.637255	6ghm	NHE
XP_022083261.1	0.428571	3q9n	COA
XP_022083261.1	0.428571	4zfh	MG
XP_022083261.1	0.428571	4zfh	MG
XP_022083261.1	0.428571	4zfh	MG
XP_022083261.1	0.417582	5ma5	NA
XP_022083261.1	0.423913	7b4v	MG
XP_022083261.1	0.406593	5oyj	CA
XP_022083261.1	0.406593	5oyj	CA
XP_022083261.1	0.406593	7b4w	CA
XP_022097497.1	0.349817	3fby	CA
XP_022097497.1	0.349817	3fby	CA
XP_022097497.1	0.349817	3fby	CA
XP_022097497.1	0.349817	3fby	CA
XP_022097497.1	0.349817	3fby	CA
XP_022097497.1	0.349817	3fby	CA
XP_022097497.1	0.349817	3fby	CA
XP_022097497.1	0.349817	3fby	CA
XP_022097497.1	0.349817	3fby	CA
XP_022097497.1	0.349817	3fby	CA
XP_022097497.1	0.349817	3fby	CA
XP_022097497.1	0.349817	3fby	CA
XP_022097497.1	0.349817	3fby	CA
XP_022097497.1	0.349817	3fby	CA
XP_022097497.1	0.349817	3fby	CA
XP_022097497.1	0.349817	3fby	CA
XP_022097497.1	0.349817	3fby	CA
XP_022097497.1	0.349817	3fby	CA
XP_022097497.1	0.349817	3fby	CA
XP_022097497.1	0.349817	3fby	CA
XP_022097497.1	0.349817	3fby	CA
XP_022097497.1	0.349817	3fby	CA
XP_022097497.1	0.349817	3fby	CA
XP_022097497.1	0.349817	3fby	CA
XP_022097497.1	0.349817	3fby	CA
XP_022097497.1	0.349817	3fby	CA
XP_022097497.1	0.349817	3fby	CA
XP_022097497.1	0.349817	3fby	CA
XP_022097497.1	0.349817	3fby	CA
XP_022097497.1	0.349817	3fby	CA
XP_022097497.1	0.349817	3fby	CA
XP_022097497.1	0.358333	1yo8	CA
XP_022097497.1	0.358333	1yo8	CA
XP_022097497.1	0.394737	1ux6	CA
XP_022097497.1	0.339623	4xzu	MG
XP_022097497.1	0.367647	6pol	NO3
XP_022097497.1	0.367647	6pol	NO3
XP_022097497.1	0.367647	6pol	NO3
XP_022097497.1	0.367647	6pol	NO3
XP_022097497.1	0.367647	6pol	NO3
XP_022097497.1	0.367647	6pol	NO3
XP_022097497.1	0.303797	4rn5	ZN
XP_022097497.1	0.303797	4rn5	ZN
XP_022097497.1	0.303797	5c7g	BCN
XP_022097497.1	0.303797	5c7g	NA
XP_022097497.1	0.303797	6fmf	TFA
XP_022097497.1	0.289308	5dn2	DIO
XP_022097497.1	0.289308	5dq0	ZN
XP_022097497.1	0.289308	5dq0	ZN
XP_022097497.1	0.275229	5uk5	CA
XP_022097497.1	0.275229	5uk5	CA
XP_022097497.1	0.335878	7do4	CA
XP_022097497.1	0.262069	2vme	CA
XP_022097497.1	0.262069	2vme	ZN
XP_022097497.1	0.309353	2w94	NI
XP_022097497.1	0.309353	2wn2	1PG
XP_022097497.1	0.309353	2wn3	1PG
XP_022097497.1	0.262069	2vmc	1PG
XP_022097497.1	0.262069	2vmc	1PG
XP_022097497.1	0.262069	2vmd	1PG
XP_022097497.1	0.284672	3m0c	CA
XP_022097497.1	0.284672	3m0c	CA
XP_022097497.1	0.267544	5b4x	CA
XP_022097497.1	0.267544	5b4x	CA
XP_022097497.1	0.267544	5b4x	CA
XP_022097497.1	0.267544	5b4x	CA
XP_022097497.1	0.299401	6vfr	CA
XP_022097497.1	0.299401	6vfr	CA
XP_022097497.1	0.299401	6vfr	CA
XP_022097497.1	0.299401	6vfr	CA
XP_022097497.1	0.299401	6vfr	NA
XP_022097497.1	0.30303	5szn	CA
XP_022097497.1	0.30303	5szn	CA
XP_022097497.1	0.306122	6e6b	CA
XP_022097497.1	0.306122	6e6b	CA
XP_022097497.1	0.266667	5w1d	K
XP_022097497.1	0.259259	6bwn	K
XP_022097497.1	0.359551	4xl1	CA
XP_022097497.1	0.284722	5dzw	CA
XP_022097497.1	0.278107	6vfu	CA
XP_022097497.1	0.26776	6vg1	CA
XP_022097497.1	0.26776	6vg1	CA
XP_022097497.1	0.283951	6vg1	CA
XP_022097497.1	0.283951	6vg1	CA
XP_022097497.1	0.298507	5mwb	CA
XP_022097497.1	0.281407	5vvm	CA
XP_022097497.1	0.3125	2vj3	CA
XP_022097497.1	0.3125	2vj3	NA
XP_022097497.1	0.309278	7sz8	MG
XP_022097497.1	0.282609	5fm9	CA
XP_022097497.1	0.282609	5fma	CA
XP_022097497.1	0.256757	5tfl	NA
XP_022097497.1	0.296296	2w86	CA
XP_022097497.1	0.276074	2wcp	NA
XP_022097497.1	0.276074	2wcp	NA
XP_022097497.1	0.276074	2whv	K
XP_022097497.1	0.276074	2whv	K
XP_022097497.1	0.276074	2whv	K
XP_022097497.1	0.276074	3mvs	CA
XP_022097497.1	0.276074	3mvs	CA
XP_022097497.1	0.26506	5szr	CA
XP_022097497.1	0.278481	7jgz	CA
XP_022097497.1	0.278481	7jgz	CA
XP_022097497.1	0.288344	5k8r	NA
XP_022097497.1	0.275	6bx7	CA
XP_022097497.1	0.3	5dzy	CA
XP_022097497.1	0.306122	5uz8	CA
XP_022097497.1	0.306122	5uz8	GSH
XP_022097497.1	0.269841	5w4t	CA
XP_022097497.1	0.30303	4zpn	CA
XP_022097497.1	0.301471	4d90	CA
XP_022097497.1	0.344444	5szl	CA
XP_022094689.1	0.285714	4i2y	CA
XP_022094689.1	0.285714	4i2y	CA
XP_022094689.1	0.257576	1ncy	MN
XP_022094689.1	0.257576	1ncy	MN
XP_022094689.1	0.257576	1ytz	CA
XP_022094689.1	0.257576	1ytz	CA
XP_022094689.1	0.257576	1yv0	MG
XP_022094689.1	0.257576	1yv0	MG
XP_022094689.1	0.285714	2ggm	CA
XP_022097706.1	0.3	6n4x	MG
XP_022097706.1	0.28125	4or2	CLR
XP_022097706.1	0.28125	4or2	CLR
XP_022097706.1	0.28125	4or2	CLR
XP_022097706.1	0.28125	4or2	CLR
XP_022097706.1	0.385057	5c5c	CA
XP_022097706.1	0.385057	5c5c	CA
XP_022097706.1	0.3	3lmk	MG
XP_022097706.1	0.3	6n50	QUS
XP_022097706.1	0.329609	5k5s	CA
XP_022097706.1	0.280899	5x2m	NA
XP_022097706.1	0.315789	5x2o	NA
XP_022088189.1	0.344828	5vzv	ZN
XP_022088189.1	0.344828	5vzv	ZN
XP_022088189.1	0.29661	7xt2	ZN
XP_022088189.1	0.29661	7xt2	ZN
XP_022088189.1	0.29661	7xt2	ZN
XP_022088189.1	0.252174	5olm	ZN
XP_022088189.1	0.258824	5h83	ZN
XP_022109133.1	0.283465	5k6v	ZN
XP_022109133.1	0.283465	5k6v	ZN
XP_022109133.1	0.283465	5k6v	ZN
XP_022109133.1	0.283465	5k6v	ZN
XP_022109133.1	0.283465	5k6v	ZN
XP_022109133.1	0.295	4bqc	NA
XP_022109133.1	0.26087	7y8s	NA
XP_022109133.1	0.26087	7y8s	NA
XP_022109133.1	0.26087	7y8s	NA
XP_022109133.1	0.26087	7y8s	NA
XP_022109133.1	0.273171	7y8s	NA
XP_022109133.1	0.273171	7y8s	NA
XP_022109133.1	0.270161	2wim	CA
XP_022109133.1	0.270161	2wim	CA
XP_022109133.1	0.294372	2yd9	B3P
XP_022109133.1	0.307692	2yd9	B3P
XP_022109133.1	0.280612	3f7p	CA
XP_022109133.1	0.306533	2yd3	NA
XP_022109133.1	0.25	2yd3	NA
XP_022109133.1	0.266667	6i9s	NA
XP_022109133.1	0.256098	4xhq	NA
XP_022109133.1	0.256098	4xhq	NA
XP_022109133.1	0.256098	4xhq	NA
XP_022109133.1	0.306818	4xhq	NA
XP_022109133.1	0.306818	4xhq	NA
XP_022109449.1	0.254717	7jni	HEZ
XP_022109449.1	0.323529	6os1	CLR
XP_022109449.1	0.266187	4ib4	CLR
XP_022109449.1	0.266187	4ib4	OLB
XP_022109449.1	0.251748	6wgt	CLR
XP_022109449.1	0.308725	7f61	CLR
XP_022109449.1	0.258741	6i9k	RET
XP_022109449.1	0.296774	5t1a	ZN
XP_022109449.1	0.272059	4n6h	NA
XP_022109449.1	0.255319	5cxv	0HK
XP_022109449.1	0.255319	5cxv	Y01
XP_022109449.1	0.285714	6akx	NO3
XP_022109449.1	0.280576	4u15	TAR
XP_022109449.1	0.25	6vi4	CLR
XP_022109449.1	0.276786	3vw7	NA
XP_022109449.1	0.306122	4xnv	CLR
XP_022109449.1	0.306122	4xnv	Y01
XP_022109449.1	0.306122	4xnv	Y01
XP_022109449.1	0.274648	5mx1	NI
XP_022109449.1	0.268657	3rfs	MG
XP_022109449.1	0.251701	5a8e	NA
XP_022109449.1	0.251701	5a8e	MHA
XP_022109449.1	0.255319	4gbr	CAU
XP_022109449.1	0.255319	4lde	NA
XP_022109449.1	0.255319	4lde	1WV
XP_022109449.1	0.255319	4ldl	1WV
XP_022109449.1	0.255319	4ldo	1WV
XP_022109449.1	0.255319	5jqh	CLR
XP_022109449.1	0.275	5xnp	NA
XP_022109449.1	0.275	5xnp	CA
XP_022109449.1	0.275	5xnp	CA
XP_022109449.1	0.275	5xnp	CA
XP_022109449.1	0.275	5xnp	CA
XP_022109449.1	0.275	5xnp	CA
XP_022109449.1	0.275	5xnp	CA
XP_022109449.1	0.275	5xnq	NA
XP_022109449.1	0.275	5xnq	CA
XP_022109449.1	0.255319	6mxt	MG
XP_022109449.1	0.255319	6mxt	NI
XP_022109449.1	0.251701	4bvn	P32
XP_022103027.1	0.283582	4tr2	CA
XP_022103027.1	0.252033	3umi	ZN
XP_022103027.1	0.252033	3umk	CU
XP_022103027.1	0.252033	3umk	CU
XP_022103027.1	0.252033	5buo	ZN
XP_022103027.1	0.252033	5buo	ZN
XP_022103027.1	0.252033	5buo	ZN
XP_022103027.1	0.316176	6z0c	K
XP_022103027.1	0.251256	4ciu	ADP
XP_022103027.1	0.251256	4ciu	ADP
XP_022084611.1	0.378109	3sog	K
XP_022084611.1	0.252632	5ol2	FAD
XP_022084611.1	0.252632	5ol2	CA
XP_022111334.1	0.306122	4x1z	NA
XP_022111334.1	0.306122	4x1z	NA
XP_022079755.1	0.290323	6apl	C5P
XP_022098363.1	0.281646	4bwr	MG
XP_022098363.1	0.274882	6deh	NI
XP_022079689.1	0.358156	5ma5	NA
XP_022079689.1	0.327526	5lec	B3P
XP_022079689.1	0.375635	6moi	MG
XP_022079689.1	0.351351	6moj	TAR
XP_022079689.1	0.351351	6moj	TAR
XP_022079689.1	0.394366	3q9n	COA
XP_022079689.1	0.372414	5oyj	CA
XP_022079689.1	0.372414	5oyj	CA
XP_022079689.1	0.372414	5oyj	NA
XP_022079689.1	0.372414	5oyj	CA
XP_022093604.1	0.272727	5dsg	0HK
XP_022093604.1	0.252809	4u15	TAR
XP_022093604.1	0.287582	4dkl	MPG
XP_022093604.1	0.287582	4dkl	MPG
XP_022093604.1	0.328358	6wgt	CLR
XP_022093604.1	0.328358	6wh4	CLR
XP_022093604.1	0.328358	6a93	ZN
XP_022093604.1	0.328358	6a94	A6L
XP_022093604.1	0.328358	7voe	CLR
XP_022093604.1	0.328358	7wc8	CLR
XP_022093604.1	0.328358	7wc8	CLR
XP_022093604.1	0.328358	7wc8	CLR
XP_022093604.1	0.288732	6to7	PGW
XP_022093604.1	0.288732	6to7	NA
XP_022093604.1	0.288732	6to7	PGW
XP_022093604.1	0.282609	6vi4	CLR
XP_022093604.1	0.270115	2z73	RET
XP_022093604.1	0.303279	4ib4	OLB
XP_022093604.1	0.304688	6kuw	CLR
XP_022093604.1	0.295082	4ea3	OLB
XP_022093604.1	0.255639	5t1a	ZN
XP_022093604.1	0.28125	3pds	CLR
XP_022093604.1	0.28125	3d4s	CLR
XP_022093604.1	0.253846	6akx	NO3
XP_022093604.1	0.28125	6ps0	CAU
XP_022093604.1	0.28125	6ps2	OLB
XP_022093604.1	0.28125	6ps2	OLB
XP_022093604.1	0.28125	6ps2	OLB
XP_022093604.1	0.28125	6ps2	OLB
XP_022093604.1	0.28125	2rh1	CLR
XP_022093604.1	0.28125	4qkx	NA
XP_022093604.1	0.28125	4lde	1WV
XP_022093604.1	0.28125	4ldo	1WV
XP_022093604.1	0.28125	6mxt	MG
XP_022093604.1	0.28125	6mxt	NI
XP_022093604.1	0.256944	4xt1	SIN
XP_022093604.1	0.282258	5x93	CLR
XP_022093604.1	0.286822	7bts	1WV
XP_022093604.1	0.286822	7bu7	1WV
XP_022093604.1	0.251969	2vt4	P32
XP_022093604.1	0.251969	2vt4	D10
XP_022093604.1	0.251969	2y00	Y01
XP_022093604.1	0.251969	2y00	Y01
XP_022093604.1	0.251969	2y00	2CV
XP_022093604.1	0.251969	2y00	2CV
XP_022093604.1	0.251969	2y00	2CV
XP_022093604.1	0.251969	2y00	2CV
XP_022093604.1	0.251969	2y00	2CV
XP_022093604.1	0.251969	2y00	2CV
XP_022093604.1	0.251969	2y00	2CV
XP_022093604.1	0.251969	2y00	2CV
XP_022093604.1	0.251969	2y00	2CV
XP_022093604.1	0.251969	2y00	2CV
XP_022093604.1	0.251969	2y03	5FW
XP_022094590.1	0.271429	3u6n	CA
XP_022094590.1	0.284483	3u6n	CA
XP_022094590.1	0.304348	4hyo	K
XP_022094590.1	0.304348	4hyo	K
XP_022094590.1	0.304348	4hyo	HEZ
XP_022094590.1	0.304348	4hyo	HEZ
XP_022094590.1	0.304348	4hyo	HEZ
XP_022094590.1	0.304348	4hz3	HEZ
XP_022094590.1	0.27451	3ifx	MTN
XP_022094590.1	0.27451	3ifx	TBA
XP_022094590.1	0.27451	3ifx	MTN
XP_022094590.1	0.3	3lde	NA
XP_022094590.1	0.3	3lde	NA
XP_022094590.1	0.3	3lde	NA
XP_022094590.1	0.3	4qe9	K
XP_022079492.1	0.455026	6zpl	NA
XP_022079492.1	0.416216	7wgd	NA
XP_022079492.1	0.416216	7wgd	Y01
XP_022079492.1	0.416216	7wgd	CLR
XP_022079492.1	0.403226	4xpb	CLR
XP_022079492.1	0.405405	6m0z	LNR
XP_022079492.1	0.405405	6m3z	D10
XP_022079492.1	0.405405	6m47	D10
XP_022079492.1	0.405018	4xpa	42J
XP_022079492.1	0.405405	6m0f	NA
XP_022079492.1	0.405405	6m2r	D10
XP_022079492.1	0.405405	6m2r	D10
XP_022079492.1	0.405405	4xp1	LDP
XP_022079492.1	0.405405	4xp9	MPO
XP_022079492.1	0.375	5i6x	CLR
XP_022079492.1	0.375	5i6x	8PR
XP_022079492.1	0.375	5i71	D12
XP_022079492.1	0.375	5i71	HEX
XP_022079492.1	0.375	5i73	C14
XP_022079492.1	0.252101	4us3	NA
XP_022079492.1	0.252101	4us4	78M
XP_022079492.1	0.252101	4us4	78N
XP_022079492.1	0.382353	6yu4	PCW
XP_022079492.1	0.297436	4mm4	NA
XP_022079492.1	0.282051	3f3a	C14
XP_022079492.1	0.285714	3mpq	MTN
XP_022079492.1	0.282051	3usg	UND
XP_022079492.1	0.276923	4fxz	UND
XP_022108714.1	0.682353	1hqv	CA
XP_022108714.1	0.682353	1hqv	CA
XP_022108714.1	0.682353	1hqv	CA
XP_022108714.1	0.682353	1hqv	CA
XP_022108714.1	0.682353	2zn8	ZN
XP_022108714.1	0.682353	2zn8	ZN
XP_022108714.1	0.682353	2zn8	ZN
XP_022108714.1	0.682353	2zn8	NA
XP_022108714.1	0.682353	2znd	NA
XP_022108714.1	0.682353	2znd	NA
XP_022108714.1	0.682353	3wxa	ZN
XP_022108714.1	0.688623	5jjg	MG
XP_022108714.1	0.688623	5jjg	MG
XP_022108714.1	0.688623	5jjg	MG
XP_022108714.1	0.688623	2zrs	CA
XP_022108714.1	0.688623	2zrt	ZN
XP_022108714.1	0.688623	2zrt	ZN
XP_022108714.1	0.406977	4u8d	MG
XP_022108714.1	0.406977	4u8d	MG
XP_022108714.1	0.406977	4u8d	MG
XP_022108714.1	0.406977	4u8d	MG
XP_022108714.1	0.406977	4u8d	MG
XP_022108714.1	0.406977	4usl	CA
XP_022108714.1	0.407186	5mra	DM2
XP_022108714.1	0.407186	5mra	DM2
XP_022108714.1	0.354331	1alv	CA
XP_022108714.1	0.327485	4okh	PEU
XP_022108714.1	0.327485	4okh	PEU
XP_022108714.1	0.338583	6qlb	GUN
XP_022108714.1	0.325581	3ekh	CA
XP_022108714.1	0.310078	1y6w	TBU
XP_022108714.1	0.317829	6ya9	CA
XP_022108714.1	0.317829	6ya9	CA
XP_022108714.1	0.310078	6u3a	NA
[truncated: 205,250+ more rows]

## Sheet: statistics
analogue_id	entry_count	transplant_count
00S	7	7
010	2	4
017	4	4
03S	20	23
04A	1	2
04J	2	2
06U	1	2
083	2	11
08T	51	65
093	9	9
09L	12	14
09O	2	4
09P	3	6
09R	3	6
0FX	2	2
0HK	275	333
0J9	9	9
0JN	4	4
0JO	18	21
0KX	18	20
0LI	132	157
0O2	14	14
0T3	4	5
0V5	3	3
0YR	1	2
112	44	45
11D	2	3
12V	8	9
13D	1	2
13P	11	12
13X	1	1
140	38	45
144	50	61
152	21	22
15P	129	248
16A	16	29
16D	10	14
173	8	15
17F	11	40
18W	1	1
198	25	28
19G	2	7
19Y	1	2
1AQ	2	2
1AZ	3	3
1BO	56	461
1CA	4	4
1DF	1	1
1E8	60	60
1EM	5	5
1F1	7	7
1FL	2	2
1FZ	11	11
1GP	8	8
1KA	13	38
1M3	5	17
1MZ	6	6
1N1	108	118
1N7	11	78
1NP	37	73
1OT	13	15
1PG	171	436
1PS	40	97
1PZ	5	29
1Q0	5	25
1Q8	4	11
1RO	26	26
1RY	5	5
1RZ	4	4
1S6	3	3
1S7	4	4
1SA	4	4
1SQ	21	21
1SY	3	3
1T4	2	2
1WV	291	592
1XJ	8	23
1YJ	2	5
1YN	2	3
210	4	4
22B	1	3
23J	2	6
25A	25	54
25L	18	27
29P	1	1
2AL	1	1
2AM	7	9
2AN	23	33
2BA	2	2
2BM	1	3
2CH	2	3
2CR	2	2
2CV	332	8768
2FA	6	6
2GE	5	6
2GJ	3	5
2HE	2	3
2HG	31	32
2HP	32	40
2K8	1	2
2K9	3	3
2KH	18	23
2KT	12	17
2LJ	1	2
2LO	7	14
2MD	1	1
2ME	33	34
2MO	1	1
2NV	2	2
2OH	5	6
2OP	87	142
2PG	9	17
2PN	14	15
2PO	3	3
2TM	18	21
2UE	7	7
2VS	2	2
2XB	2	3
2Y5	8	8
2YQ	10	12
33E	5	5
35G	26	32
36A	1	1
36J	1	1
37X	40	161
38O	125	134
3AA	2	2
3AB	32	50
3AD	4	4
3AM	9	10
3AT	10	12
3BB	1	2
3C7	3	6
3CN	4	5
3CO	21	27
3CX	4	5
3D1	15	19
3DM	6	7
3FX	24	25
3GC	4	6
3HA	3	3
3HB	8	9
3JD	16	18
3L4	1	1
3L5	1	1
3LM	4	10
3MI	1	1
3MQ	1	1
3MW	3	3
3NG	20	28
3NI	1	1
3NP	12	14
3OH	2	3
3PG	32	44
3PH	9	18
3PL	21	25
3PO	36	62
3PP	1	1
3PY	5	5
3QZ	21	29
3TR	15	29
3TV	7	13
3UK	15	15
3VV	1	1
3ZQ	2	2
402	1	1
42J	24	34
42R	27	84
444	5	5
44E	4	4
45T	1	1
478	4	4
486	4	4
4A3	2	8
4BW	8	10
4C8	9	30
4CH	1	1
4CS	3	3
4CT	2	2
4DY	5	5
4HP	2	3
4HY	4	4
4IP	43	90
4IR	1	3
4K4	11	18
4KZ	3	3
4LJ	1	5
4LM	4	8
4M6	2	2
4M7	2	2
4MU	8	18
4MV	10	13
4MZ	14	15
4NC	8	17
4NP	39	40
4OA	29	38
4P0	24	49
4PT	12	22
4RF	1	1
4SP	45	47
4TK	13	15
4TL	12	14
4TM	13	15
4TY	3	3
4U5	3	3
4U6	12	14
4UO	1	1
4YP	2	2
551	1	2
58A	1	1
5AD	9	12
5CD	2	4
5FW	264	303
5GI	1	2
5GP	124	207
5ID	23	24
5M8	6	84
5MY	3	3
5OD	55	72
5PA	4	4
5TL	4	6
5TX	2	2
5XH	5	5
60G	2	4
64Z	41	43
6AK	2	7
6CF	4	4
6CN	2	4
6EL	1	2
6EU	3	4
6FA	3	3
6GU	3	3
6HE	3	3
6KT	3	3
6MD	5	7
6N5	2	2
6NA	33	66
6NR	2	2
6NT	1	1
6NV	2	2
6OU	13	101
6PC	12	20
6PE	5	10
6PL	7	7
6PQ	8	37
6V0	1	1
6WG	3	3
6ZL	2	40
6ZW	6	7
73B	5	6
741	22	22
78M	32	228
78N	20	100
78P	15	15
79M	9	111
79P	2	2
7C6	16	32
7E8	4	7
7F2	2	2
7HE	3	3
7HP	2	2
7MT	5	8
7PG	24	45
7PH	4	7
7PR	2	10
88S	1	1
8BS	2	2
8DG	13	15
8EF	1	1
8EL	3	4
8EO	1	1
8EY	1	2
8FD	1	1
8FL	1	1
8GM	1	1
8GT	8	13
8H8	15	17
8K6	127	321
8KS	7	13
8L1	4	9
8L4	4	11
8L7	4	8
8L9	4	19
8LA	2	4
8M0	6	6
8NK	1	1
8PE	3	3
8PF	5	10
8PH	1	7
8PR	83	87
8Q1	5	5
8X3	11	11
8XQ	23	24
8ZB	10	11
919	68	68
97M	6	17
97Y	19	36
9A3	2	2
9AU	6	6
9BE	2	6
9BG	2	2
9CA	1	1
9CR	67	116
9CS	7	10
9DG	3	3
9F2	4	7
9JE	6	8
9JT	10	16
9KL	2	2
9MG	1	1
9ON	7	12
9P7	1	1
9PE	1	2
9PL	52	60
9R5	23	36
9RN	23	88
9SL	5	9
9SZ	3	9
9T6	1	3
9XA	2	2
9Y6	1	1
9Y7	1	2
9Z0	30	100
A0O	9	9
A12	11	16
A1R	14	18
A2P	16	16
A2R	12	12
A3G	1	4
A3S	1	1
A5A	11	13
A5P	2	2
A6L	147	160
AA5	5	7
AAC	4	6
AAE	33	53
ABH	3	3
ABN	14	23
ABU	88	114
AC2	9	11
ACD	21	26
ACH	80	165
ACI	9	28
ACK	26	40
ACM	68	83
ACN	41	85
ACV	2	5
AD3	4	4
AD9	22	24
ADE	192	204
ADN	353	396
ADP	1120	2746
ADQ	4	5
AE3	34	82
AE4	18	21
AER	51	63
AES	5	6
AF	5	10
AF3	339	389
AG2	12	13
AG7	1	3
AGA	13	13
AGI	17	18
AGP	5	11
AHD	3	3
AIC	2	2
AIR	1	2
AKG	136	185
AKR	15	19
ALD	15	16
ALF	301	366
ALQ	116	140
AM2	6	12
AMH	21	22
AMI	14	15
AMP	621	992
AMQ	7	7
AMZ	6	10
ANH	5	6
ANJ	1	1
ANL	2	2
ANN	7	18
AOV	21	21
AP2	17	25
AP5	27	57
APC	100	171
APJ	3	3
APR	53	91
AR6	32	64
ARS	46	83
ART	3	3
AS1	2	5
ASC	20	26
ASD	7	8
AT2	1	1
AT3	29	76
AT5	3	3
ATP	1340	3435
ATR	16	16
AUC	3	7
AUD	5	15
AV0	1	1
AV1	5	5
AVJ	5	8
AVU	5	5
AX2	1	1
AX7	9	14
AYE	49	63
AZA	2	2
AZG	3	3
AZM	10	18
AZR	1	1
AZZ	5	5
B12	9	28
B29	3	9
B3N	10	38
B3P	444	602
B49	85	112
B4P	42	62
B96	64	66
BAB	17	28
BAP	5	11
BAT	15	30
BAU	1	2
BAX	28	29
BB2	15	25
BCL	1	3
BCN	245	487
BCR	5	16
BCZ	5	5
BE7	17	21
BER	8	9
BES	34	46
BET	37	44
BEY	13	15
BEZ	162	280
BF2	7	11
BFQ	3	6
BFZ	1	2
BHF	44	116
BHL	1	2
BHO	16	21
BIG	1	2
BIO	4	7
BJ2	4	4
BJE	1	1
BLA	6	10
BLD	36	60
BLR	1	1
BLS	1	1
BMF	11	14
BML	1	1
BNI	1	1
BNL	1	1
BNZ	1	1
BO2	9	12
BO3	151	287
BO4	38	54
BPH	1	2
BPY	2	2
BR8	1	1
BRJ	1	3
BRL	9	16
BRN	2	2
BSU	6	7
BTI	4	14
BTL	1	2
BTN	18	21
BU1	266	608
BU2	39	76
BU3	150	338
BU8	1	1
BUA	34	46
BUD	21	22
BX7	5	8
BXA	10	10
BXB	5	9
BYN	1	1
BYZ	11	25
BZ2	6	15
BZB	2	2
BZI	21	21
BZJ	2	6
C0R	15	15
C14	23	55
C15	8	20
C1O	6	12
C21	12	32
C2E	4	8
C2F	22	34
C2O	9	14
C3S	29	32
C5J	2	2
C5P	98	122
C6P	23	27
C78	12	12
C8E	83	414
C91	4	9
CA	4157	26618
CAD	5	7
CAH	2	2
CAM	2	11
CAQ	26	31
CAU	339	460
CAZ	3	4
CB3	1	1
CB4	2	2
CBE	3	3
CBO	10	11
CBY	2	2
CCD	18	55
CCN	44	205
CDC	2	3
CDM	3	5
CDP	126	143
CE1	15	48
CE3	3	6
CEF	2	2
CEL	22	23
CER	1	2
CES	2	2
CFF	169	198
CFH	3	14
CFQ	19	48
CHD	63	139
CHO	4	5
CHT	63	127
CHW	3	3
CIS	6	16
CIY	13	20
CL0	1	1
CL6	32	35
CLA	5	64
CLM	22	39
CLR	586	4070
CM5	83	1657
CMK	1	1
CMO	27	39
CMP	65	272
CMQ	1	1
CNA	20	21
CNI	5	6
CO	593	1266
CO2	22	46
CO3	175	381
COA	320	856
COD	7	8
COI	14	16
COM	22	32
COS	8	18
COU	39	40
CP	4	12
CP6	1	1
CPF	1	2
CPJ	1	3
CPL	1	1
CPQ	33	35
CPS	172	772
CPT	21	62
CPZ	57	186
CQA	2	7
CQG	1	1
CQX	5	12
CR	10	15
CRD	17	22
CRN	5	6
CS2	3	3
CSC	1	2
CT4	1	2
CTC	9	9
CTN	47	53
CTP	123	160
CTS	20	24
CTX	16	39
CU	243	823
CU1	37	89
CUA	1	1
CUO	2	2
CVI	9	20
CWB	13	40
CX9	7	9
CXE	2	29
CXS	128	375
CXT	25	34
CYC	1	4
CYH	14	17
CYN	21	34
CYT	3	5
CYZ	1	2
CZA	8	9
CZF	6	8
CZH	1	2
D10	349	877
D12	173	382
D15	20	27
D16	1	1
D1D	56	79
D3Y	1	2
D48	7	7
D4T	1	2
D5M	23	30
D6Q	4	4
D8F	8	8
D8W	7	7
D96	1	1
DAD	34	58
DAO	92	125
DAT	16	17
DAU	14	18
DB8	116	140
DCA	5	5
DCE	1	1
DCM	15	19
DCP	56	95
DCQ	4	4
DCR	5	5
DCS	18	19
DCW	5	5
DD9	5	5
DDF	1	2
DDQ	14	30
DDR	2	2
DDS	7	7
DEA	3	3
DEP	43	57
DES	6	8
DET	2	4
DFP	9	11
DG2	4	4
DG3	9	15
DGA	86	153
DGG	3	3
DGJ	15	16
DGP	14	16
DGT	66	113
DGZ	3	17
DHB	14	22
DHE	2	8
DHF	3	4
DHK	2	2
DHT	15	15
DIF	25	75
DIH	3	4
DIO	322	996
DIU	2	4
DKA	24	29
DKF	3	4
DKI	122	124
DLU	16	16
DM2	6	11
DMA	13	24
DME	31	106
DMF	32	202
DMG	20	22
DMJ	14	15
DMN	8	8
DN4	3	6
DNC	8	8
DND	5	9
DNF	4	6
DO3	8	12
DOG	3	3
DOL	3	3
DOR	6	9
DOW	1	2
DP1	3	3
DP6	1	1
DP9	3	3
DPF	1	2
DPM	4	7
DPO	27	30
DPV	2	2
DQY	3	3
DS8	1	8
DSH	16	17
DSQ	1	5
DST	5	6
DSZ	8	8
DTB	10	13
DTD	84	127
DTK	1	7
DTP	86	136
DTU	38	54
DTV	74	88
DUC	3	3
DUD	10	15
DUP	9	15
DUR	4	7
DUT	39	58
DVT	81	87
DW0	7	23
DX4	29	29
DX5	1	1
DXC	35	130
DXE	23	147
DXP	3	4
DXT	1	1
DXX	17	17
DYD	22	43
DZ4	18	25
E3U	2	2
E5S	1	1
E64	15	18
E9U	4	8
EAE	8	13
EBP	1	2
ECL	2	2
ECN	1	1
EDK	2	3
EDT	145	155
EEE	12	22
EF2	2	5
EFO	7	7
EFZ	9	10
EGC	2	2
EIC	16	16
EIP	1	1
EL5	2	7
ELA	5	5
EMC	30	70
EMO	18	35
EMT	3	9
ENO	10	12
EPA	9	10
EPH	13	36
EPJ	38	78
EPU	2	4
EPZ	16	17
EQ2	15	18
ER3	23	75
ER4	1	1
ERG	19	20
ERY	58	66
ESA	5	5
EST	82	139
ETE	61	84
ETF	177	308
ETM	31	70
ETX	37	70
EU3	18	28
EUG	6	7
EVB	1	8
EVF	4	8
EVP	1	2
EXI	3	3
EY4	9	20
EZA	1	2
EZL	7	7
F05	19	22
F09	6	25
F15	22	22
F3E	1	2
F3S	12	15
F3V	19	22
F43	2	2
F4S	1	1
F50	3	3
F5A	1	2
F6R	11	16
F89	2	3
FA8	16	16
FAB	2	2
FAD	225	443
FAH	6	20
FAR	62	77
FAS	2	2
FB2	41	44
FC6	8	23
FCG	10	10
FCO	1	1
FDA	58	68
FDE	2	3
FE	222	429
FE2	141	192
FEB	5	5
FEC	1	1
FEH	8	9
FEO	11	12
FER	22	26
FES	41	58
FFO	16	33
FID	7	7
FII	7	9
FJT	1	2
FK5	37	149
FL3	1	2
FLF	6	7
FLP	48	52
FLU	6	7
FMB	1	1
FMC	4	4
FMN	135	217
FNR	17	18
FO1	6	8
FO2	3	3
FOA	30	47
FOK	27	50
FOL	17	18
FON	13	20
FOR	12	16
FOT	6	8
FPP	62	102
FPS	10	13
FQ0	1	1
FQ8	2	3
FSC	7	16
FSH	1	1
FTT	33	85
FU2	12	19
FUM	79	158
FWD	11	11
FWF	11	11
FZ4	4	5
G2P	18	22
G39	10	26
G3A	1	1
G3D	34	40
G3H	10	17
G3P	31	83
G5A	5	6
G5P	14	17
G6Q	5	12
G8H	1	3
GA3	6	6
GA4	9	9
GAB	29	33
GAI	51	152
GAR	2	2
GAV	3	3
GB	19	22
GBL	84	269
GBM	3	6
GBN	2	5
GBS	32	39
GCG	6	14
GCP	116	164
GD3	40	42
GD7	10	14
GDD	31	36
GDE	1	1
GDM	4	4
GDP	463	1110
GDS	19	30
GDU	40	52
GDX	1	1
GEC	3	5
GEF	3	4
GEK	3	3
GEM	24	27
GEN	17	19
GEO	5	5
GER	30	43
GET	11	14
GFB	12	14
GFR	3	5
GG5	1	3
GGB	39	42
GHE	1	1
GIM	7	10
GJY	4	8
GLV	30	42
GM6	32	39
GMP	69	93
GNG	7	8
GNH	50	59
GNT	30	39
GO6	3	12
GOA	26	35
GOK	7	7
GOX	11	22
GP3	11	11
GP7	2	5
GP9	4	8
GPJ	4	4
GPP	7	8
GQH	1	1
GQK	1	2
GQQ	1	1
GQT	1	1
GRG	14	20
GRT	1	1
GRW	1	1
GSH	192	422
GSP	151	200
GST	5	7
GT5	1	1
GT8	1	1
GTA	18	20
GTG	39	50
GTP	403	766
GTQ	3	5
GTW	1	1
GUA	15	16
GUN	15	15
GW9	9	13
H2B	6	6
H2S	13	15
H35	2	2
H4B	9	16
H52	42	74
H6P	2	2
H7S	1	3
H92	4	8
HAE	22	54
HAI	19	21
HAM	1	2
HAS	2	4
HBA	5	7
HBD	36	38
HBI	11	14
HBX	12	31
HC3	9	9
HC4	36	58
HCA	1	1
HCI	81	90
HCY	3	5
HDA	3	3
HDD	1	2
HEA	4	5
HEB	6	7
HEC	44	145
HED	6	15
HEE	1	2
HEM	308	525
HEX	80	140
HEZ	220	464
HFG	4	4
HFK	2	4
HGB	6	17
HGX	2	2
HH2	1	2
HI6	23	67
HIW	5	5
HMC	5	20
HMH	2	2
HOA	18	19
HP6	7	8
HP7	1	2
HPA	14	16
HPD	1	2
HQE	2	2
HQJ	1	6
HQO	6	6
HQY	25	25
HR5	24	30
HSA	4	5
HTH	2	3
HTL	5	7
HTO	203	238
HV2	14	77
HVK	12	57
HVS	1	2
HW9	3	3
HX2	1	1
HXA	12	13
HXG	9	18
I22	2	4
I2I	8	21
I3A	1	1
I3C	32	132
I3P	108	149
I46	1	3
I7P	3	8
IAC	19	22
IBM	16	30
IBP	24	27
ICB	7	7
ICS	1	2
ICT	6	14
ID1	1	1
IDQ	41	74
IFM	13	18
IHS	12	17
IK2	19	26
IM2	3	4
IM4	4	8
IM5	3	5
IMH	5	5
IMI	1	1
IMN	28	49
IMO	3	3
IMP	37	47
IND	51	61
INE	3	3
INS	36	52
IP8	3	3
IPD	15	19
IPE	10	20
IPH	61	143
IPM	5	7
IPR	8	13
IR3	29	33
IRE	7	11
IRF	4	4
IRG	1	2
IS8	11	32
ISC	3	5
ISJ	9	15
ISN	23	32
ISP	29	33
ISZ	10	11
ITT	1	1
ITU	1	1
IUM	16	38
IVA	7	7
IVM	13	26
IZA	24	27
IZN	1	2
J01	35	35
J1V	11	13
J2U	2	2
J2X	2	2
J4V	11	13
J8N	1	3
JAA	3	3
JBJ	2	3
JC8	3	6
JCW	3	6
JDP	30	31
JEF	18	26
JFQ	3	7
JFS	29	37
JHJ	39	70
JI5	2	2
JK8	1	2
JM2	3	3
JM5	3	3
JM7	3	3
JMM	37	46
JOV	21	43
JRR	3	3
JUG	4	5
JZ3	2	3
K	1820	4455
K0G	27	35
K2B	1	1
K34	6	10
K3Q	1	9
KAA	10	12
KAI	11	12
KAN	3	3
KAP	3	6
KDG	3	3
KDH	2	4
KEG	40	188
KEU	2	2
KFV	1	1
KH2	24	82
KHS	1	2
KIF	9	10
KIR	18	19
KIV	6	8
KLN	43	110
KMP	36	38
KMT	7	7
KNA	9	21
KOU	8	9
KRS	8	8
KS1	104	104
KWK	2	7
KZH	10	118
L0B	30	86
L1P	2	2
L2P	1	2
LA	6	6
LAB	14	29
LAC	43	58
LAE	1	1
LAR	13	17
LB6	4	28
LCP	3	9
LDN	6	18
LDP	71	75
LDQ	3	6
LDT	6	6
LEA	15	18
LFA	21	101
LFX	1	3
LG3	1	2
LH9	1	6
LHY	3	3
LLH	1	2
LLL	3	8
LMP	5	5
LMR	78	100
LNK	31	156
LNR	27	27
LOB	3	6
LOC	14	15
LOP	6	6
LP4	5	5
LP5	33	58
LPA	6	7
LPP	25	30
LPX	4	4
LQW	1	2
LSA	21	81
LSN	43	138
LSS	8	17
LU2	38	65
LU8	6	35
LVV	12	12
LY5	4	8
LYA	4	7
LZ1	70	70
M2M	40	95
M2P	4	5
M4R	1	2
M77	42	50
M7G	22	29
M7U	1	2
MA4	6	8
MAE	17	38
MAH	9	9
MAY	2	4
MB3	13	29
MBN	23	35
MBO	7	8
MBR	14	32
MC3	25	296
MCN	2	2
MCO	4	4
MCT	1	2
MD1	2	2
MDN	3	3
MDO	2	2
ME2	19	44
MEE	3	3
MER	2	2
MEV	3	3
MF4	21	40
MFX	1	4
MG	4805	18683
MGD	5	9
MGF	82	95
MGM	4	4
MGP	28	41
MGT	34	52
MGX	11	13
MH0	6	7
MHA	264	275
MHF	6	19
MIV	1	1
MIX	30	71
MIY	6	10
MK2	4	4
ML1	4	8
MLA	284	452
MLD	4	20
MLK	35	47
MLT	286	452
MMC	7	8
MMK	5	5
MMP	1	1
MMV	1	2
MMZ	13	17
MN	1092	2362
MN1	3	3
MN3	9	11
MNB	10	17
MNM	5	6
MO7	6	14
MOA	4	6
MOH	73	496
MOM	2	2
MOO	9	15
MOS	1	1
MPG	218	514
MPO	149	196
MQ7	4	4
MRY	9	15
MRZ	56	61
MSS	2	2
MTA	20	24
MTE	9	9
MTL	9	10
MTN	23	44
MTP	1	2
MTQ	1	1
MTV	1	1
MTX	11	18
MVL	15	18
MXE	35	92
MXN	2	5
MYC	44	113
MYI	5	20
MYS	148	845
MYY	3	3
MZM	7	7
N1Y	1	2
N22	1	2
N2H	2	3
N2O	11	47
N2P	23	98
N2Y	1	2
N7I	2	4
N8E	7	21
N8V	3	3
NA0	8	9
NA7	21	22
NAD	356	638
NAI	194	255
NAJ	13	13
NAP	278	576
NAR	3	3
NBN	1	2
NBU	1	2
NCA	98	185
NCC	34	35
NCD	4	10
NCN	5	6
NCT	95	132
ND2	4	12
NDP	262	458
NDS	22	24
NEC	178	197
NEH	62	84
NEN	12	12
NEQ	12	14
NET	4	4
NFK	2	8
NFU	1	1
NFV	1	1
NGH	22	57
NGT	8	9
NH3	12	25
NHE	217	425
NI	1272	2311
NI9	2	2
NIO	11	20
NIZ	1	3
NKP	9	25
NLG	9	21
NM2	9	9
NME	44	71
NMG	1	1
NMN	17	18
NMR	1	4
NMY	6	6
NO	45	55
NO2	21	46
NO3	1293	5536
NOJ	34	44
NOS	28	46
NOV	15	62
NPO	84	211
NPS	6	7
NPX	9	21
NTA	3	9
NTJ	30	37
NTM	3	3
NTN	9	16
NTZ	3	6
NU4	22	29
NUP	2	3
NVP	9	16
NVU	3	6
NXL	3	4
O	39	79
O31	1	1
O4B	47	129
OAA	21	30
OAN	8	12
OBN	8	9
OC9	1	2
OCA	24	26
OCT	200	480
OCZ	12	21
ODN	6	10
OE7	1	2
OED	1	2
OEH	4	14
OES	1	3
OF7	1	2
OGK	10	20
OH	57	60
OHN	1	1
OHT	11	22
OK3	3	4
OLB	433	3282
OMD	1	1
OMP	2	5
ONM	32	102
OOG	3	3
OPC	2	17
OPE	23	34
ORO	9	14
OSB	12	12
OSF	4	45
OSM	5	123
OTA	21	26
OTR	6	6
OTS	1	1
OXD	29	31
OXE	9	9
OXL	101	123
OXM	48	104
OXN	8	16
OXQ	2	2
OXY	67	135
P06	15	16
P15	46	54
P1T	10	11
P1Z	5	24
P32	271	325
P34	16	22
P3A	8	16
P3P	1	2
P3S	4	14
P4C	87	662
P4K	8	11
P4O	5	5
P4P	1	1
P52	14	18
P5S	16	48
P6F	1	1
P6L	16	84
P9P	1	3
PA8	1	2
PAB	15	16
PAC	12	12
PAE	10	12
PAH	2	2
PAL	4	9
PAM	76	238
PAO	2	3
PAP	44	51
PAR	5	8
PAZ	5	5
PB2	51	310
PBC	10	19
PBD	2	4
PBE	3	3
PBG	1	1
PBM	6	8
PBU	14	36
PBZ	15	24
PC	119	176
PC4	13	16
PCD	2	3
PCF	46	53
PCG	43	150
PCI	34	64
PCP	2	3
PCT	6	6
PCW	61	603
PD2	42	47
PDA	18	25
PDC	5	8
PDG	4	7
PDN	3	5
PDO	44	103
PDY	4	9
PEA	17	18
PED	1	1
PEE	31	172
PEF	78	128
PEO	49	167
PEP	18	24
PEQ	1	1
PER	19	27
PEU	9	14
PFB	5	15
PGA	12	16
PGH	2	2
PGO	182	1616
PGR	61	336
PGU	10	19
PGW	296	907
PH2	2	3
PHB	3	3
PHN	5	6
PHQ	15	16
PHS	1	1
PHT	14	16
PHU	41	43
PI	25	45
PIB	17	18
PIK	2	2
PIM	5	6
PIN	14	19
PIO	85	344
PIS	6	6
PIT	29	33
PKZ	14	44
PL3	1	2
PL6	3	3
PL9	2	4
PLA	2	4
PLC	15	19
PLG	22	44
PLP	124	362
PLR	11	19
PLS	15	16
PML	4	4
PMM	1	1
PMP	59	95
PMS	47	81
PMV	2	2
PNM	2	2
PNN	1	2
PNS	17	34
PNT	1	1
PNX	2	3
PO2	3	3
PO3	18	18
POA	3	5
POG	6	12
POL	107	404
POP	200	295
POV	25	110
PP1	53	53
PP2	14	14
PP9	3	7
PPE	2	4
PPF	6	6
PPG	8	13
PPI	137	388
PPK	1	2
PPQ	3	5
PPS	34	40
PPV	54	74
PPY	17	20
PQ0	1	1
PQN	2	2
PQQ	6	8
PRE	1	1
PRF	1	1
PRL	21	25
PRX	12	23
PRZ	1	1
PSF	2	2
PSZ	3	4
PT1	1	1
PT5	39	60
PTD	19	55
PTY	25	76
PUT	15	28
PX2	6	11
PX4	22	819
PX6	10	26
PXG	4	7
PXL	4	5
PXN	11	21
PXP	5	10
PY0	1	1
PYC	14	24
PYE	7	7
PYG	1	2
PYJ	11	15
PYR	65	120
PYZ	36	79
PZI	5	5
PZO	13	42
Q16	2	2
Q21	6	9
Q5M	2	7
Q6F	22	24
Q9C	3	5
QBK	1	2
QBQ	1	3
QCT	18	21
QGP	2	4
QHC	4	4
QHP	8	22
QHS	8	25
QMR	16	32
QQJ	2	2
QQM	2	2
QSC	5	6
QT8	22	40
QUE	63	86
QUI	4	8
QUK	3	3
QUS	51	57
QVR	10	11
R16	23	439
R1T	4	4
R2R	21	41
R5T	13	15
R5X	13	15
R78	45	57
RAL	7	23
RAP	13	19
RB6	3	3
RBF	12	12
RCO	1	1
RCP	1	3
RDC	3	3
REA	59	87
RED	12	15
RES	1	2
RET	203	335
RFP	5	11
RHQ	1	1
RIO	1	3
RIS	2	2
RMN	8	8
ROL	10	10
ROP	4	8
RSA	11	20
RSF	8	96
RSG	8	15
RTL	11	13
RTZ	56	122
RU7	2	3
RW1	3	5
RW2	1	2
RWZ	1	1
RX8	61	101
RXT	28	28
S1P	33	36
S1S	13	118
S3H	1	1
S3P	2	2
S4M	3	3
S4P	6	9
SA1	3	4
SAE	1	1
SAH	216	321
SAL	53	60
SAM	195	308
SAS	4	10
SB2	6	7
SB4	2	2
SBT	19	22
SCM	2	2
SE4	25	32
SEK	8	16
SEY	8	40
SF3	1	1
SF4	72	126
SFD	4	4
SFG	82	89
SFY	21	21
SGM	25	45
SGV	18	20
SHF	4	4
SHH	14	37
SHV	6	16
SIN	271	359
SIW	143	1238
SJ5	2	6
SKE	90	96
SKM	6	12
SLA	2	2
SLU	16	30
SLX	1	1
SM2	2	2
SMA	5	7
SN0	1	1
SNE	53	55
SNO	8	9
SO1	4	6
SO2	3	3
SO3	92	134
SOA	12	13
SP5	7	8
SPD	54	89
SPH	6	12
SPM	35	93
SPO	1	1
SPV	1	1
SQX	3	6
SR7	11	11
SRM	4	8
SRT	158	246
SRY	3	10
SSA	11	18
SSN	5	10
ST9	3	3
STE	200	1173
STI	97	145
STL	99	145
STR	70	83
STU	258	294
SUZ	6	8
SV7	19	50
SVR	25	72
SVS	9	22
SWA	4	5
SY9	26	68
SYM	4	4
SYN	30	74
SYW	1	1
T1C	2	2
T27	7	11
T3	7	10
T3F	2	2
T3Q	6	10
T3Y	1	4
T44	7	12
T55	1	3
T5A	3	6
T5X	1	2
T6F	1	2
T6J	5	9
T8T	2	14
T99	32	69
TAC	9	17
TAD	7	7
TAK	44	97
TAM	302	545
TAR	484	857
TAS	1	1
TAT	29	56
TAU	9	11
TB2	51	181
TBA	7	10
TBE	1	2
TBN	6	9
TBR	14	30
TBU	115	322
TCA	17	19
TCE	40	42
TCH	13	23
TCL	7	7
TCW	8	8
TD2	5	8
TD6	5	9
TD7	5	9
TD8	5	9
TD9	5	9
TDA	10	11
TDB	1	1
TDI	1	1
TDK	5	8
TDL	2	4
TDM	1	1
TDR	8	8
TDW	5	9
TE	25	26
TEO	2	2
TEP	164	191
TES	18	35
TEW	42	90
TEX	16	22
TF3	2	2
TFA	117	221
TFB	5	7
TFP	54	131
TFX	10	25
TG1	10	12
TGS	1	2
TH4	4	8
THA	13	16
THD	1	2
THF	2	6
THG	27	36
THH	9	11
THJ	16	20
THU	2	4
THV	7	7
THW	2	2
THY	2	2
TKT	5	10
TLM	1	1
TLO	8	18
TMA	137	738
TME	14	37
TMO	105	291
TMP	25	36
TNF	1	1
TOD	13	16
TOE	32	73
TOL	9	24
TON	4	11
TOP	1	4
TP7	1	2
TP9	2	2
TPF	48	56
TPP	24	51
TPS	1	2
TPT	6	7
TPW	6	9
TQP	1	1
TRD	133	409
TRH	4	6
TRT	19	60
TS5	3	5
TS6	6	12
TSB	4	6
TSN	14	39
TSS	7	10
TSU	3	6
TT8	2	2
TTN	2	3
TTP	62	100
TUD	8	9
TUM	1	1
TYD	45	57
TYL	14	16
TYM	4	6
TYZ	5	6
TZ4	18	27
TZ5	18	27
TZD	5	8
U10	2	2
U2F	29	29
U3P	1	1
U52	10	10
U5P	72	144
U8Q	1	4
U94	12	12
UAG	1	1
UD1	92	128
UD2	41	59
UDH	8	8
UDP	239	343
UDX	26	28
UGA	27	44
UGB	14	14
UHB	12	13
UMP	8	17
UMQ	27	47
UN9	9	14
UND	146	262
UNU	36	51
UP6	2	4
UPG	91	117
UPL	2	7
UQ	3	3
UQ1	6	9
UQ2	2	2
UQ5	2	9
UQ6	1	1
URA	10	10
URC	2	2
URE	70	759
URF	8	9
URI	51	74
URP	1	1
URS	3	5
UTP	64	110
UUL	4	9
UUU	2	2
UVW	2	2
V14	8	9
V55	33	45
V90	8	10
VCA	10	15
VD3	42	48
VDM	1	1
VDX	7	7
VDY	3	4
VES	1	3
VFS	10	12
VFV	2	4
VGH	28	29
VGL	3	4
VIA	11	25
VIB	5	9
VIV	7	12
VN4	30	37
VNL	3	6
VNS	1	3
VO4	201	265
VOR	32	35
VRT	3	3
VU2	10	21
VU3	9	26
VVA	8	43
VVO	2	2
VX	31	58
VX6	72	205
VYJ	2	2
WAA	5	8
WCC	1	1
WO4	61	83
WWF	2	2
WWO	8	12
WWX	6	7
WY1	6	7
WZO	3	3
X22	1	5
X23	1	1
X2N	27	32
X5M	1	1
X7A	1	1
X8Z	13	17
XAN	7	7
XAT	1	1
XAX	2	2
XCC	1	1
XCG	8	10
XEB	2	2
XEG	10	15
XFJ	3	8
XFK	3	8
XFN	3	5
XG4	17	26
XGS	6	51
XL3	3	3
XMP	10	17
XP4	3	6
Y01	399	1135
Y3G	1	1
Y6V	2	4
Y70	3	4
YF2	2	4
YPG	1	1
YSA	5	5
YSY	4	6
YT3	57	99
YY3	3	5
YYY	3	5
YZY	1	1
Z80	10	11
ZAR	8	8
ZCW	3	3
ZEA	1	1
ZER	1	1
ZEX	1	1
ZIT	2	3
ZK1	11	11
ZMA	230	663
ZN	3728	15852
ZOL	3	3
ZPC	1	3
ZST	7	7
ZZ7	3	4
ZZX	16	16
NA	5218	20663
